Inhibition of Lgt in Gram-negative bacteria

1     Novel inhibitors of *E. coli* lipoprotein diacylglyceryl transferase  
2             are insensitive to resistance caused by *lpp* deletion

3  
4     Jingyu Diao<sup>1</sup>, Rie Komura<sup>2</sup>, Tatsuya Sano<sup>2</sup>, Homer Pantua<sup>1</sup>, Kelly M. Storek<sup>1</sup>, Hiroko Inaba<sup>2</sup>,  
5     Haruhiko Ogawa<sup>2</sup>, Cameron L. Noland<sup>3</sup>, Yutian Peng<sup>1</sup>, Susan L. Gloor<sup>4†</sup>, Donghong Yan<sup>5</sup>, Jing  
6     Kang<sup>5</sup>, Anand Kumar Katakam<sup>6</sup>, Nicholas N. Nickerson<sup>1†</sup>, Cary D. Austin<sup>6</sup>, Jeremy Murray<sup>3</sup>,  
7     Steven T. Rutherford<sup>1</sup>, Mike Reichelt<sup>6</sup>, Yiming Xu<sup>4</sup>, Min Xu<sup>5</sup>, Hayato Yanagida<sup>2</sup>, Junichi  
8     Nishikawa<sup>2</sup>, Patrick C Reid<sup>2</sup>, Christian N. Cunningham<sup>7,#</sup> and Sharookh B. Kapadia<sup>1,#</sup>

9  
10    Departments of Infectious Diseases<sup>1</sup>, Structural Biology<sup>3</sup>, Biochemical and Cellular  
11    Pharmacology<sup>4</sup>, Translational Immunology<sup>5</sup>, Pathology<sup>6</sup> and Early Discovery Biochemistry<sup>7</sup>,  
12    Genentech, South San Francisco, CA 94080 USA

13    <sup>2</sup> Peptidream Inc., 3-25-23 Tonomachi, Kawasaki-ku, Kawasaki City, Kanagawa Prefecture,  
14    JAPAN 210-0821

15    † Present address: S.L.G. - EpiCypher Inc., 6 Davis Drive Durham NC; N.N.N. - Hoffmann-La  
16    Roche Ltd., 7070 Mississauga Road Mississauga, ON Canada

17

18    **Abstract word count:** 150

19    **# Corresponding authors**

20    Sharookh B. Kapadia (E-mail: [kapadia.sharookh@gene.com](mailto:kapadia.sharookh@gene.com))

21    Christian Cunningham (E-mail: [cunningham.christian@gene.com](mailto:cunningham.christian@gene.com))

## Inhibition of Lgt in Gram-negative bacteria

### 22 **Abstract**

23 Lipoprotein diacylglyceryl transferase (Lgt) catalyzes the first step in the biogenesis of  
24 Gram-negative bacterial lipoproteins which play crucial roles in bacterial growth and pathogenesis.  
25 We demonstrate that Lgt depletion in a clinical uropathogenic *Escherichia coli* strain leads to  
26 permeabilization of the outer membrane and increased sensitivity to serum killing and antibiotics.  
27 Importantly, we identify the first ever described Lgt inhibitors that potently inhibit Lgt biochemical  
28 activity *in vitro* and are bactericidal against wild-type *Acinetobacter baumannii* and *E. coli* strains.  
29 Unlike inhibition of other steps in lipoprotein biosynthesis, deletion of the major outer membrane  
30 lipoprotein, *lpp*, is not sufficient to rescue growth after Lgt depletion or provide resistance to Lgt  
31 inhibitors. Our data validate Lgt as a novel druggable antibacterial target and suggest that inhibition  
32 of Lgt may not be sensitive to one of the most common resistance mechanisms that invalidate  
33 inhibitors of downstream steps of bacterial lipoprotein biosynthesis and transport.

34

35

36

37

38

39

40

41

42

43

## Inhibition of Lgt in Gram-negative bacteria

### 44 **Introduction**

45           The cell envelope of a typical Gram-negative bacterium consists of two membranes: a  
46 phospholipid inner membrane (IM) and an asymmetrical outer membrane (OM), the latter of which  
47 is composed of a phospholipid inner leaflet and a lipopolysaccharide (LPS) outer leaflet. The IM  
48 and OM are separated by the periplasm, which contains a peptidoglycan (PG) cell wall (reviewed in  
49 detail in (Silhavy, Kahne, & Walker, 2010)). *E. coli* encodes >90 lipoproteins, many of which are  
50 localized to the inner leaflet of the OM, but can also be exposed on the bacterial cell surface  
51 (Cowles, Li, Semmelhack, Cristea, & Silhavy, 2011; Wilson & Bernstein, 2015). Bacterial  
52 lipoproteins play critical roles in adhesion, nutrient uptake, antibiotic resistance, virulence, invasion  
53 and immune evasion (Kovacs-Simon, Titball, & Michell, 2011), making the lipoprotein biosynthetic  
54 and transport pathways attractive targets for novel antibacterial drug discovery.

55           Lipoprotein biosynthesis in Gram-negative bacteria is mediated by three IM localized  
56 enzymes: Lgt, LspA and Lnt (Figure 1). All prelipoproteins contain a signal peptide followed by  
57 a conserved four amino acid sequence, [LVI][ASTVI][GAS]C, also known as a lipobox  
58 (Schlesinger, 1992), and are secreted through the IM via the Sec or Tat pathways. After secretion  
59 through the IM, Lgt catalyzes the attachment of a diacylglycerol moiety from phosphatidylglycerol  
60 to the thiol group of the conserved +1 position cysteine via a thioether bond (Sankaran & Wu,  
61 1994). The second enzyme, prolipoprotein signal peptidase (LspA), is an aspartyl endopeptidase  
62 which cleaves off the signal peptide N-terminal of the conserved diacylated +1 cysteine (M.  
63 Tokunaga, Tokunaga, & Wu, 1982), and is the molecular target of the Gram-negative-specific  
64 natural-product antibiotics globomycin and myxovirescin (Dev, Harvey, & Ray, 1985; Gerth,  
65 Irschik, Reichenbach, & Trowitzsch, 1982; Olatunji et al., 2020; Xiao, Gerth, Müller, & Wall,  
66 2012). In Gram-negative and high-GC Gram-positive bacteria, a third enzyme, lipoprotein N-acyl

## Inhibition of Lgt in Gram-negative bacteria

67 transferase (Lnt), catalyzes the addition of a third acyl chain to the amino group of the N-terminal  
68 cysteine via an amide linkage. Mature triacylated lipoproteins destined for the OM are extracted  
69 from the IM by the LolCDE ATP-binding cassette (ABC) transporter and transported to the OM via  
70 a periplasmic chaperone protein LolA and an OM lipoprotein LolB (Narita, 2011; Narita & Tokuda,  
71 2010) (Figure 1).

### 72 **Figure 1: Lipoprotein biosynthesis and transport in Gram-negative bacteria**

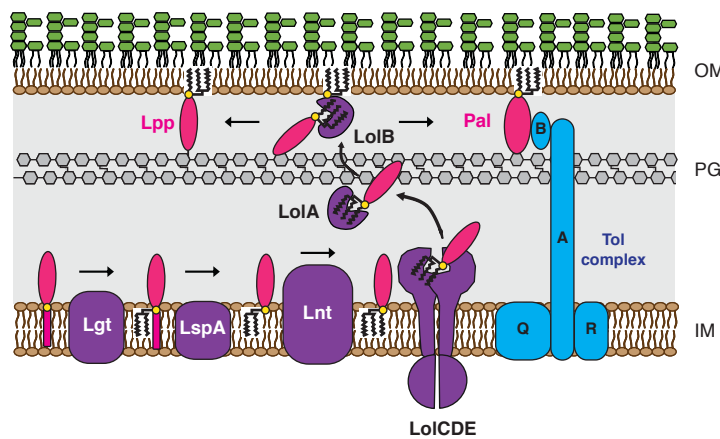

73

74 Two OM lipoproteins, Lpp (also known as Murein lipoprotein or Braun's lipoprotein) and  
75 Pal (peptidoglycan-associated lipoprotein), mediate tethering of the PG layer to the OM in *E. coli*.  
76 Lpp is a small ~8 kDa lipoprotein that is the most abundant OM protein in *E. coli* (~500,000  
77 molecules per cell) and a third of all Lpp is covalently linked to PG (Cowles et al., 2011; Neidhardt,  
78 1996). *E. coli* mutants deficient in Lpp exhibit increased OM permeability, leakage of periplasmic  
79 components, increased outer membrane vesicle (OMV) release and increased sensitivity to  
80 complement-mediated lysis (Diao et al., 2017; H. Suzuki et al., 1978; Yem & Wu, 1978).  
81 Mislocalization and accumulation of PG-linked Lpp in the inner membrane upon inhibition of LspA  
82 (Xiao et al., 2012; Zwiebel, Inukai, Nakamura, & Inouye, 1981) and LolCDE (McLeod et al., 2015;  
83 Nickerson et al., 2018) is believed to lead to bacterial cell death (Narita & Tokuda, 2011; Robichon,

## Inhibition of Lgt in Gram-negative bacteria

84 Vidal-Ingigliardi, & Pugsley, 2005; Yakushi, Tajima, Matsuyama, & Tokuda, 1997a). In addition  
85 to Lpp, Pal binds PG and interacts with OmpA, Lpp and the Tol complex, and is crucial for  
86 maintaining OM integrity in *E. coli* (Cascales, Bernadac, Gavioli, Lazzaroni, & Llobes, 2002;  
87 Clavel, Germon, Vianney, Portalier, & Lazzaroni, 1998; Leduc, Ishidate, Shakibai, & Rothfield,  
88 1992; Mizuno, 1979). While non-natural product inhibitors of LspA and LolCDE have been  
89 previously discovered (Kitamura, Owensby, Wall, & Wolan, 2018; McLeod et al., 2015), no  
90 inhibitors of the first committed step in bacterial lipoprotein biosynthesis have been described.  
91 Since many natural product antibiotics, including those that inhibit LspA, are cyclic (Igarashi, 2019;  
92 Rossiter, Fletcher, & Wuest, 2017), we screened a macrocyclic peptide library to identify Lgt  
93 inhibitors. In this study, we identify and characterize the first inhibitors of Lgt that inhibit growth  
94 of wild-type *E. coli* and *A. baumannii* strains in addition to other OM-permeabilized Gram-negative  
95 species. We demonstrate that, unlike inhibitors of LspA and LolCDE, treatment with Lgt inhibitors  
96 does not lead to the significant accumulation of PG-linked Lpp forms in the IM and as such, are not  
97 sensitive to resistance mediated by deletion of *lpp*.

98

99

100

101

102

103

104

105

106

## Inhibition of Lgt in Gram-negative bacteria

### 107 **Results**

108 **Modest depletion of Lgt leads to increased OM permeability and loss of bacterial viability is**  
109 **not rescued by deletion of *lpp*.** Previous investigations into the role of Lgt in *E. coli* have focused  
110 on laboratory strains, specifically those lacking the O-antigen of LPS. Here, we engineered the  
111 uropathogenic *E. coli* clinical isolate CFT073 so that the only copy of *lgt* was under control of an  
112 arabinose-inducible promoter (CFT073 $\Delta$ *lgt*), and hence requires arabinose for Lgt expression. As  
113 expected, genetic depletion of Lgt was lethal *in vitro* and growth was rescued after  
114 complementation with *E. coli lgt* (Figure 2a). *thyA*, the gene that encodes thymidylate synthase, is  
115 downstream of *lgt* and its ribosome binding site overlaps with the *lgt* stop codon. We confirmed  
116 that *thyA* expression, which is regulated by transcription from the *lgt* promoter and translational  
117 coupling (Gan et al., 1995), was unchanged after Lgt depletion (Figure 2-figure supplement 1a).  
118 Complementation with *lgt* from *Pseudomonas aeruginosa* PA14 or *A. baumannii* ATCC 17978  
119 (51.6% and 48.6% sequence identity, respectively) was able to rescue viability (Figure 2a and  
120 Figure 2-figure supplement 1b). Overexpression of the *E. coli* genes encoding the downstream  
121 enzymes in lipoprotein biosynthesis (LspA, Lnt) and transport (LolCDE) did not rescue growth of  
122 CFT073 $\Delta$ *lgt* in spite of detectable levels of LspA, Lnt and LolCDE (Figure 2-figure supplement 1c-  
123 g). While depletion of ~25% of Lgt was sufficient for bactericidal activity (Figure 2b and 2c),  
124 CFT073 $\Delta$ *lgt* cells expressing as high as ~90% of normal levels of Lgt were significantly more  
125 sensitive to complement-mediated killing of the normally serum-resistant *E. coli* CFT073 and  
126 showed increased incorporation of SYTOX Green, a dye that normally does not penetrate an intact  
127 OM (Figure 2c-e). Depletion of Lgt also resulted in an expected increase in cell size (Figure 2f) and  
128 an Lpp-dependent IM contraction due to osmotic stress (Figure 2-figure supplement 2), as  
129 previously reported (Inukai et al., 1978a; Inukai, Nakajima, Osawa, Haneishi, & Arai, 1978b; Rojas

## Inhibition of Lgt in Gram-negative bacteria

130 et al., 2018). Consistent with these results, partial depletion of Lgt that still allowed for normal  
131 growth *in vitro* led to increased sensitivity to antibiotics that are normally excluded by the  
132 impermeable Gram-negative OM (Table 1). Depletion of Lgt also resulted in significant attenuation  
133 in a mouse *E. coli* bacteremic infection model (Figure 2g). Cumulatively, these data suggest that  
134 Lgt could be a good antibiotic target since partial inhibition of Lgt may be sufficient to lead to  
135 significant attenuation in growth and cellular morphology.

136

137 **Table 1:** Antibiotic sensitivity of WT CFT073 versus CFT073 $\Delta$ *lgt* cells expressing wild-type (4%  
138 Ara) or low (0.25% Ara) levels of Lgt

139  
140

| Antibiotic              | MIC ( $\mu$ M) |                            |                          |
|-------------------------|----------------|----------------------------|--------------------------|
|                         | WT CFT073      | CFT073 $\Delta$ <i>lgt</i> |                          |
|                         |                | Lgt <sup>4% Ara</sup>      | Lgt <sup>0.25% Ara</sup> |
| Vancomycin ( $\mu$ M)   | >100           | >100                       | 12.5                     |
| Rifamycin ( $\mu$ M)    | 6.3            | 6.3                        | 0.8                      |
| Penicillin G ( $\mu$ M) | >50            | >50                        | 0.8                      |
| Oxacillin ( $\mu$ M)    | >100           | >100                       | 12.5                     |
| Zeocin ( $\mu$ M)       | 12.5           | 12.5                       | 0.8                      |
| Norfloxacin ( $\mu$ M)  | 0.4            | 0.6                        | 0.2                      |

141  
142

143 Bactericidal activity of LspA and LolCDE inhibitors are sensitive to deletion of the gene  
144 encoding the major OM lipoprotein, Lpp (McLeod et al., 2015; Zwiebel et al., 1981). To determine  
145 if Lpp played a role in bacterial cell death after Lgt depletion, we constructed a *lgt* inducible  
146 deletion strain in *E. coli* MG1655 with and without *lpp* (MG1655 $\Delta$ *lgt* and MG1655 $\Delta$ *lgt* $\Delta$ *lpp*) and  
147 compared growth of these strains to *lspA* and *lolCDE* inducible deletion strains in the same  
148 backgrounds. Expectedly, *lpp* deletion rescued the growth of the *lspA* and *lolCDE* inducible  
149 deletions strains after depletion of LspA and LolCDE, respectively (Figure 2h). In contrast to LspA

## Inhibition of Lgt in Gram-negative bacteria

150 and LolCDE depletion, the *lpp* mutant was more sensitive to Lgt depletion leading to a greater loss  
151 of colony forming units (CFU) compared to that detected after Lgt depletion in cells expressing *lpp*.

152         Since the loss of *lpp* is a primary mechanism of resistance to inhibitors of LspA and  
153 LolCDE thereby complicating their potential as antibacterial targets, identification of Lgt inhibitors  
154 would uncover further biological understanding of this essential pathway, and potentially serve as  
155 better starting chemical matter to develop novel antibiotics targeting lipoprotein biosynthesis that  
156 are not sensitive to resistance mediated by *lpp* deletion.

157

158 **Identification and characterization of macrocyclic peptide inhibitors of Lgt.** Many natural  
159 products or their derivatives account for a significant number of launched drugs and sine many of  
160 them are cyclic in nature (Igarashi, 2019), we initially screened a macrocyclic peptide library to  
161 identify specific and high affinity binders of Lgt. A genetically reprogrammed *in vitro* translation  
162 system combined with mRNA affinity selection methods was used to generate large macrocycle  
163 peptide libraries with sizes varying from 8-14 amino acids in length (Goto, Katoh, & Suga, 2011;  
164 Ishizawa, Kawakami, Reid, & Murakami, 2013; Kashiwagi, Reid, & Inc, 2013) (Figure 3a). The  
165 variable sequence (6-12 amino acids) of the macrocycle libraries encoded the random incorporation  
166 of 11 natural amino acids (Ser, Tyr, Trp, Leu, Pro, His, Arg, Asn, Val, Asp, and Gly) and 5 non-  
167 natural amino acids (Figure 3b). The screening of the libraries is schematically depicted in Figure  
168 3c. Lgt-biotin was solubilized in 0.02% n-Dodecyl  $\beta$ -D-maltoside (DDM), immobilized on  
169 streptavidin magnetic beads and incubated with the macrocyclic library. Iterative rounds of affinity  
170 selection were performed to identify Lgt-binding macrocycles. After five rounds of enrichment,

171



## Inhibition of Lgt in Gram-negative bacteria

172 **Figure 2: Lgt is essential for *in vitro* growth, membrane integrity, serum resistance and**  
 173 **virulence**

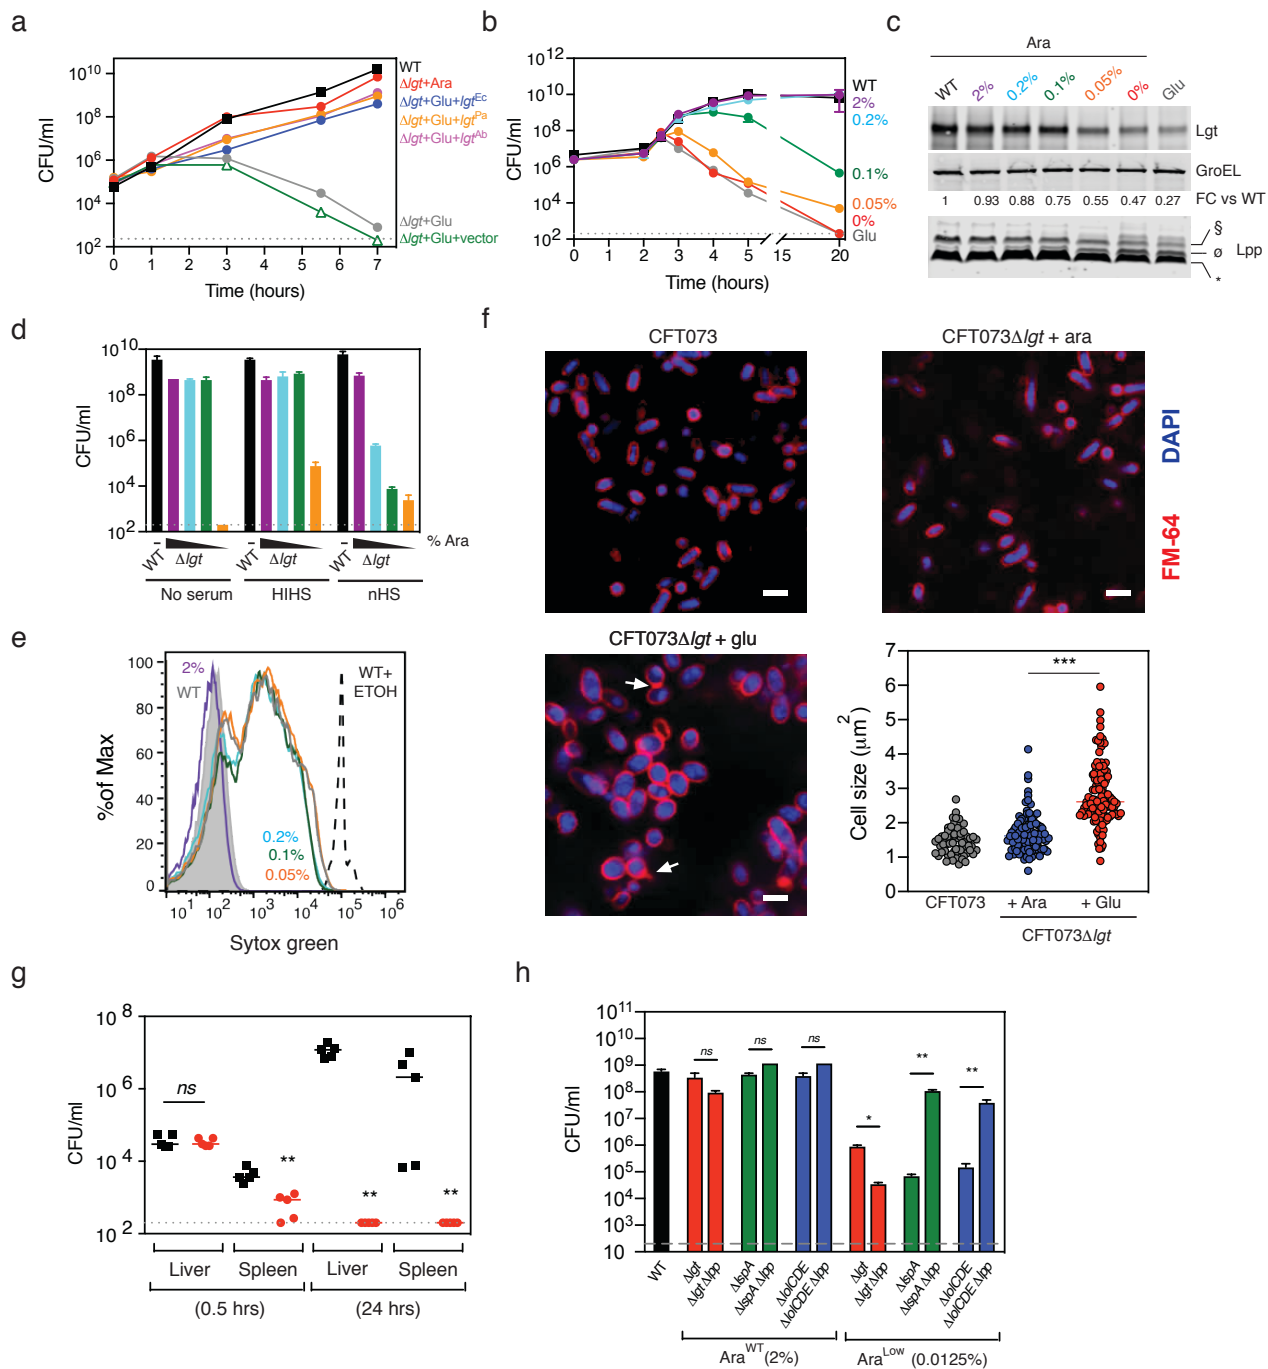

174

175

## Inhibition of Lgt in Gram-negative bacteria

176 two additional rounds of off-rate selections were performed by increasing the wash stringency  
177 before high affinity binders were eluted. Hit macrocycles were identified using next generation  
178 sequencing on the last four rounds of selection followed by a frequency analysis calculation. Three  
179 macrocycles were identified from these screens, **508**, **692**, and **693** (Figure 3-figure supplement 1),  
180 with a frequency enrichment in the final round of selection of 4.1%, 19.4%, and 10.1%,  
181 respectively, as measured by NGS. **508** contains 8 amino acids with a molecular weight (MW) of  
182 1264.49 Da. **692** and **693** each contain 7 amino acids and are related to one another with a charge  
183 swap at position 2, and have MWs of 1428.66 and 1259.55 respectively. The calculated LogPs  
184 (cLogP), which is the logarithm of the compounds partition coefficient between n-octanol and water  
185 and a measure of a molecule's hydrophilicity, were 4, 1.8 and 1.7 for **508**, **692** and **693**,  
186 respectively. **692** was synthesized with a Gly off of the C-terminus and renamed G9066 (Figure  
187 3d). During re-synthesis, both **508** and **693** were synthesized with a Gly-Lys-Lys tail off of the C-  
188 terminus to aide in solubility of these macrocycles and were renamed G2823 and G2824,  
189 respectively (Figure 3d).

190 We then tested the ability of G9066, G2823 and G2824 to inhibit *E. coli* Lgt enzymatic  
191 activity *in vitro* by measuring the release of glycerol phosphate which is a by-product of the Lgt-  
192 catalyzed transfer of diacylglyceryl from phosphatidylglycerol to a peptide substrate via formation  
193 of a thioether bond. The peptide substrate was derived from the Pal lipoprotein (Pal-IAAC, where  
194 C is the conserved cysteine that is modified by Lgt). While glycerol-1-phosphate (G1P) is the  
195 expected by-product of the Lgt enzymatic activity (Sankaran & Wu, 1994), the  
196 phosphatidylglycerol substrate used in our biochemical assay contains a racemic glycerol moiety at  
197 the end of phosphatidyl group, and hence both G1P and glycerol-3-phosphate (G3P) are released  
198 from phosphatidylglycerol as Lgt catalyzes the reaction (Figure 3e). The detection of G3P is based

## Inhibition of Lgt in Gram-negative bacteria

### 199 Figure 3: Identification of Lgt inhibitors

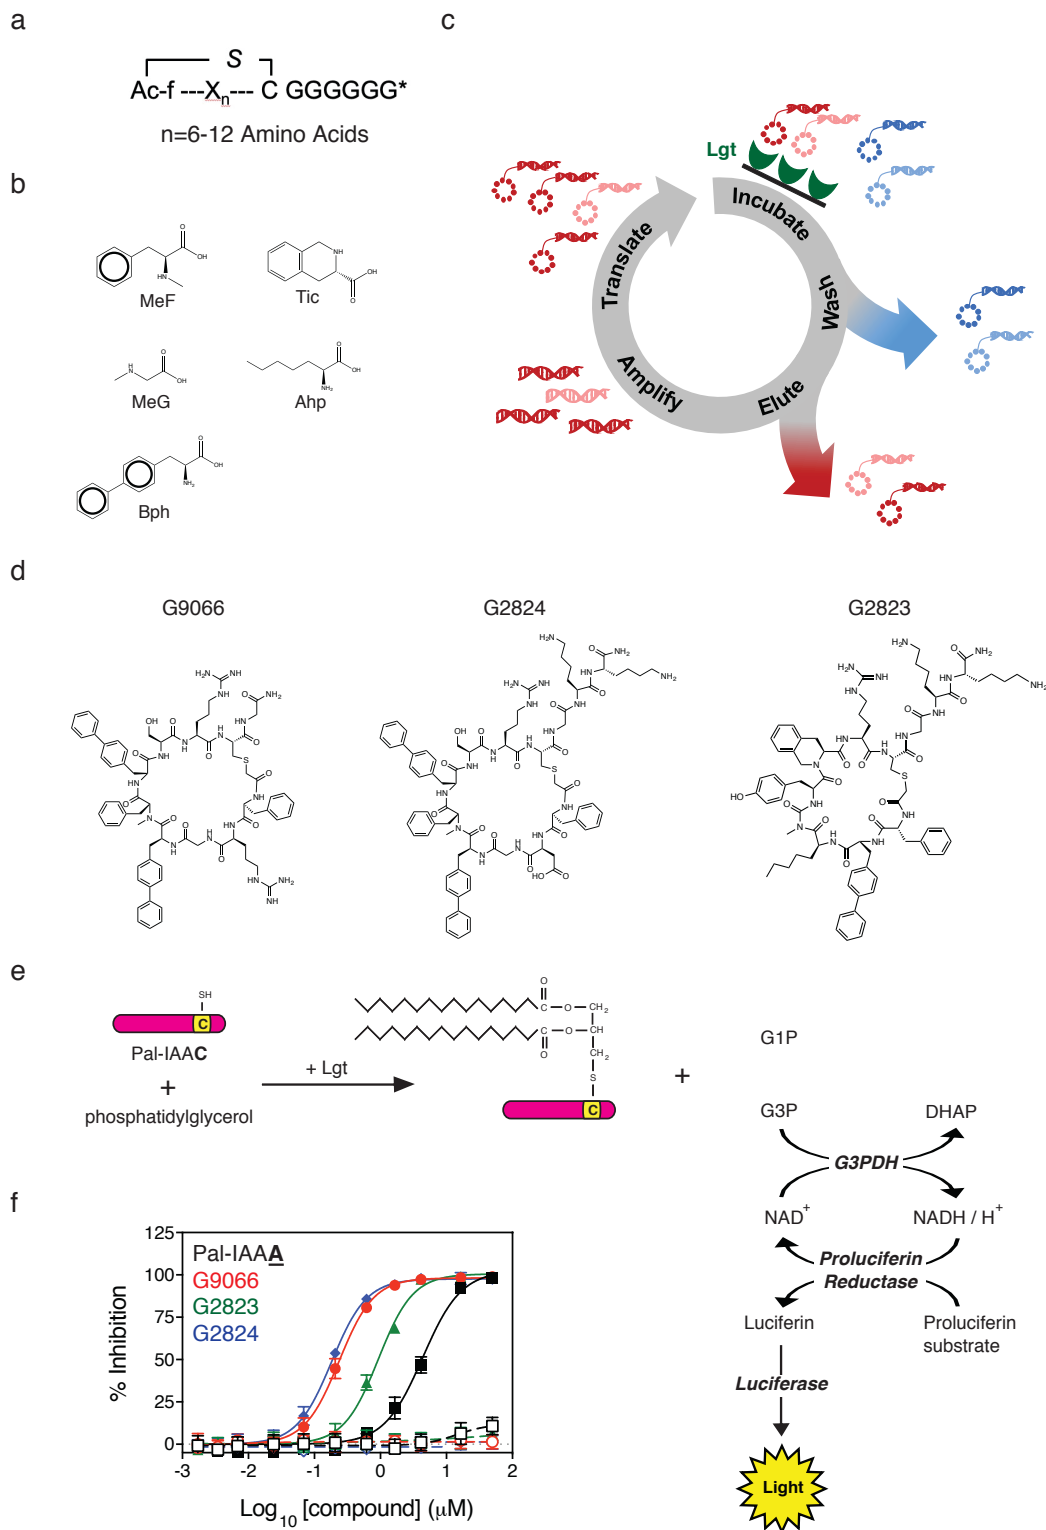

## Inhibition of Lgt in Gram-negative bacteria

201 on a coupled luciferase reaction which is described in more detail in the Methods and in Figure 3e.  
 202 G9066, G2823 and G2824 potently inhibited Lgt biochemical activity ( $IC_{50}$ =0.24  $\mu$ M, 0.93  $\mu$ M and  
 203 0.18  $\mu$ M, respectively) (Figure 3f). In comparison, a mutant Pal peptide substrate with the  
 204 conserved cysteine mutated to alanine (Pal-IAAA $\Delta$ ), which cannot get modified and acts as a Lgt-  
 205 binding nonreactive, substrate-based competitive inhibitor, inhibited Lgt with an  $IC_{50}$ =4.4  $\mu$ M  
 206 (Figure 3f). When tested against bacterial cells in minimal inhibitory concentration (MIC) growth  
 207 assays, G9066 and G2824 inhibited growth of WT *A. baumannii* 19606 with a MIC = 37.5  $\mu$ M.  
 208 G2823 and G2824 inhibited *E. coli* MG1655 growth with a MIC = 50  $\mu$ M (Table 2). OM  
 209 permeabilization either genetically (*imp4213* mutation) or chemically (EDTA treatment) of all

210 **Table 2: Growth inhibition of a panel of bacterial strains and eukaryotic cells by Lgti, LspAi**  
 211 **and LolCDEi**

| Bacteria                                                         | Strain                            | Lgti  |       |       | LspAi | LolCDEi | Vancomycin |
|------------------------------------------------------------------|-----------------------------------|-------|-------|-------|-------|---------|------------|
|                                                                  |                                   | G9066 | G2823 | G2824 | GBM   | C1      |            |
| <i>E. coli</i><br>(MIC, $\mu$ M)                                 | MG1655                            | >100  | 50    | 50    | 25    | >100    | >100       |
|                                                                  | MG1655 + EDTA                     | 3.1   | 3.1   | 3.1   | 0.8   | 3.1     | 3.1        |
|                                                                  | MG1655 $\Delta$ <i>lpp</i> + EDTA | 3.1   | 3.1   | 3.1   | 12.5  | 12.5    | 0.8        |
|                                                                  | CFT073                            | 100   | 83.3  | 92    | 29.2  | 50      | >100       |
|                                                                  | CFT073 $\Delta$ <i>lpp</i>        | 31.3  | 25    | 62.5  | >100  | >100    | >100       |
|                                                                  | CFT073 + EDTA                     | 3.1   | 4.2   | 3.1   | 1.1   | 2.1     | 0.8        |
|                                                                  | CFT073 $\Delta$ <i>lpp</i> + EDTA | 1.6   | 3.1   | 2.3   | 4.7   | 9.4     | 0.8        |
|                                                                  | CFT073 <i>imp4213</i>             | 5.7   | 8.4   | 8.4   | 0.5   | 2.1     | 0.6        |
| CFT073 <i>imp4213</i> $\Delta$ <i>lpp</i>                        | 6.8                               | 9.4   | 8.9   | 11.5  | 17.7  | 0.7     |            |
| <i>A. baumannii</i><br>(MIC, $\mu$ M)                            | 19606                             | 37.5  | 100   | 37.5  | 25    | 100     | >100       |
|                                                                  | 19606 + EDTA                      | 3.1   | 4.7   | 6.3   | 0.6   | 12.5    | 0.2        |
| <i>P. aeruginosa</i><br>(MIC, $\mu$ M)                           | PA14                              | >100  | >100  | >100  | >100  | >100    | >100       |
|                                                                  | PA14 <i>imp4213</i>               | 6.3   | 6.3   | 6.3   | 50    | >100    | 12.5       |
|                                                                  | PA14 + EDTA                       | 6.3   | 6.3   | 6.3   | 50    | 50      | 6.3        |
| <i>S. aureus</i><br>(MIC, $\mu$ M)                               | USA300                            | 6.3   | >100  | >100  | >100  | >100    | 0.4        |
| Mammalian<br>cytotoxicity<br>( $EC_{50}$ , $\mu$ M) <sup>s</sup> | HepG2                             | > 100 | > 100 | > 100 | > 100 | > 100   | > 100      |
|                                                                  | Hela                              | > 100 | > 100 | > 100 | > 100 | > 100   | > 100      |
|                                                                  | 293T                              | > 100 | > 100 | > 100 | > 100 | > 100   | > 100      |

## Inhibition of Lgt in Gram-negative bacteria

212 \* All *E. coli* MIC values represent averages from at least four independent experiments each performed in duplicate.  
213 For other bacterial strains, MIC values represent averages from two independent experiments each performed in  
214 duplicate  
215 † Mammalian cytotoxicity values are representative of three independent replicates  
216

217

218 Gram-negative strains, including *P. aeruginosa* PA14 and *A. baumannii* 19606, led to growth  
219 inhibition (Table 2). Interestingly, *lpp* deletion in either CFT073*imp*4213 or CFT073 treated with  
220 EDTA did not lead to increases in G9066, G2823 or G2824 MIC, unlike that seen with inhibitors of  
221 LspA and LolCDE (Table 2). In fact, *lpp* deletion in WT CFT073 cells led to a modest increase in  
222 G9066, G2823 and G2824 potency. G2823 and G2824 showed minimal non-specific activity  
223 against eukaryotic cells and the Gram-positive *Staphylococcus aureus* strain USA300, consistent  
224 with data demonstrating *lgt* is dispensable for Gram-positive bacterial growth *in vitro* (Stoll,  
225 Dengjel, Nerz, & Götz, 2005). In contrast, G9066 inhibited growth of USA300 to a greater extent  
226 suggesting G9066 may have additional targets or non-specific cellular effects. Given G9066 and  
227 G2824 are very similar, we decided to focus the remainder of this study on G2823 and G2824  
228 (hereafter referred to as Lgti).

229

### 230 **G2823 and G2824 specifically inhibit Lgt in *E. coli***

231 While the Lgti inhibited both Lgt enzymatic function and bacterial growth, it was unclear whether  
232 inhibition of bacterial cell growth was mediated by specific inhibition of Lgt function. We were  
233 unable to raise on-target resistant mutants to Lgti, and hence multiple experimental approaches were  
234 undertaken to determine if inhibition of bacterial growth was indeed Lgt-dependent. As the  
235 accumulation of Lpp intermediates detected by Western blot analyses has been successfully used to

## Inhibition of Lgt in Gram-negative bacteria

236 verify inhibition or deletion of specific enzymes involved in lipoprotein biosynthesis or transport  
237 (Narita & Tokuda, 2011; Nickerson et al., 2018), we asked if Lgt treatment led to the accumulation  
238 of pro-Lpp, the substrate of Lgt. We initially sought to verify the various Lpp forms by leveraging  
239 a previously described protocol using SDS fractionation (Diao et al., 2017; Nakae, Ishii, &  
240 Tokunaga, 1979; Whitfield, Hancock, & Costerton, 1983). Lysozyme was added to allow for the  
241 identification of PG-linked Lpp forms, as previously demonstrated (M. Suzuki, Hara, & Matsumoto,  
242 2002). CFT073 cell lysates were centrifuged to separate the SDS-insoluble PG-associated proteins  
243 (PAP) and SDS-soluble non-PG-associated proteins (non-PAP) (Figure 4a) and Lpp were detected  
244 by Western blot analysis. As expected, the fastest migrating form representing the triacylated  
245 mature form of Lpp (\*) was enriched in the non-PAP fraction and the PG-linked Lpp forms (†) were  
246 enriched in the PAP fraction (Figure 4b). We also detected a form corresponding to the PG-linked  
247 diacylglycerol modified pro-Lpp (DGPLP, §), as previously reported (M. Suzuki et al., 2002). We  
248 then asked if we could detect pro-Lpp in total cell lysates after Lgt depletion and used the *lspA* and  
249 *lolCDE* inducible deletion strains as controls. We confirmed that specific depletion of Lgt led to the  
250 accumulation of the unmodified pro-Lpp (UPLP, ø), (Figure 4c), consistent with previous results  
251 (Pailler, Aucher, Pires, & Buddelmeijer, 2012). While depletion of LspA led to the accumulation of  
252 DGPLP (§) and other PG-linked Lpp forms (†), depletion of LolCDE did not change the SDS-  
253 PAGE migration of Lpp as LolCDE is only critical for transport to the OM and does not affect  
254 lipoprotein biosynthesis (Figure 4c). These results now allowed us to determine whether the Lgti  
255 identified in this study inhibited Lgt in bacterial cells.

256 As the Lgti have only moderate activity against WT bacterial strains, we performed  
257 mechanistic studies with Lgti in the CFT073 cells containing the *imp4213* allele in *lptD*  
258 (CFT073*imp4213*), which leads to permeabilization of the OM (Ruiz, Falcone, Kahne, & Silhavy,

## Inhibition of Lgt in Gram-negative bacteria

259 2005). Given the high expression of Lpp, we engineered CFT073*imp4213* cells to only express an  
260 arabinose inducible *lpp* (CFT073*imp4213* $\Delta$ *lpp:lpp*<sup>Ara</sup>) to minimize the background from pre-formed  
261 Lpp. *lpp* gene expression was induced prior to treatment with sub-MIC levels of Lgti and led to an  
262 accumulation of UPLP ( $\emptyset$ , Figure 4d), similar to what was observed with the CFT073 $\Delta$ *lgt* strain  
263 (Figure 4c), and a concurrent decrease in the triacylated mature Lpp form (\*, Figure 4d). While  
264 treatment with globomycin (LspAi) led to an accumulation of DGPLP and other PG-linked Lpp  
265 forms, treatment of cells with the AstraZeneca LolCDE inhibitor C1 (LolCDEi) (McLeod et al.,  
266 2015) did not lead to significant accumulation of Lpp, which is consistent with our data using the  
267 inducible deletion strains as well as published results (Narita & Tokuda, 2011; Nickerson et al.,  
268 2018). These data demonstrate that the Lgti identified in this study inhibit the generation of mature  
269 triacylated Lpp and lead to the accumulation of UPLP, which is the substrate of Lgt.

270 Lgt on-target activity was further confirmed using two additional methods. First, Lgti  
271 treatment also led to the expected OM blebbing and increase in cell size (Figure 4e and 4f), the  
272 former of which was previously demonstrated in a Pal-deficient *E. coli* strain (Kowata, Tochigi,  
273 Kusano, & Kojima, 2016). Second, we asked whether cells expressing reduced levels of Lgt would  
274 be specifically sensitized to Lgti compared to the other inhibitors. To test this hypothesis, we  
275 utilized CRISPRi technology to decrease gene expression of the enzymes involved in lipoprotein  
276 biosynthesis and transport. BW25113 cells containing plasmids expressing dCas9 and guide RNAs  
277 (gRNAs) specific to *lgt*, *lspA*, *lolC* were treated with Lgti, LspAi and LolCDEi and bacterial growth  
278 was measured. Scrambled (scr) and a *folA*-specific gRNAs were used as negative controls. Levels  
279 of downregulation of target gene expression (Figure 4-figure supplement 1) were consistent with  
280 published reports for CRISPRi in bacterial cells (Rousset et al., 2018). Decreased expression of *lgt*  
281 specifically sensitized cells to Lgti but not LspAi and LolCDEi (Figure 4g and

## Inhibition of Lgt in Gram-negative bacteria

### 282 **Figure 4: Lgti inhibit Lgt enzymatic activity in bacterial cells.**

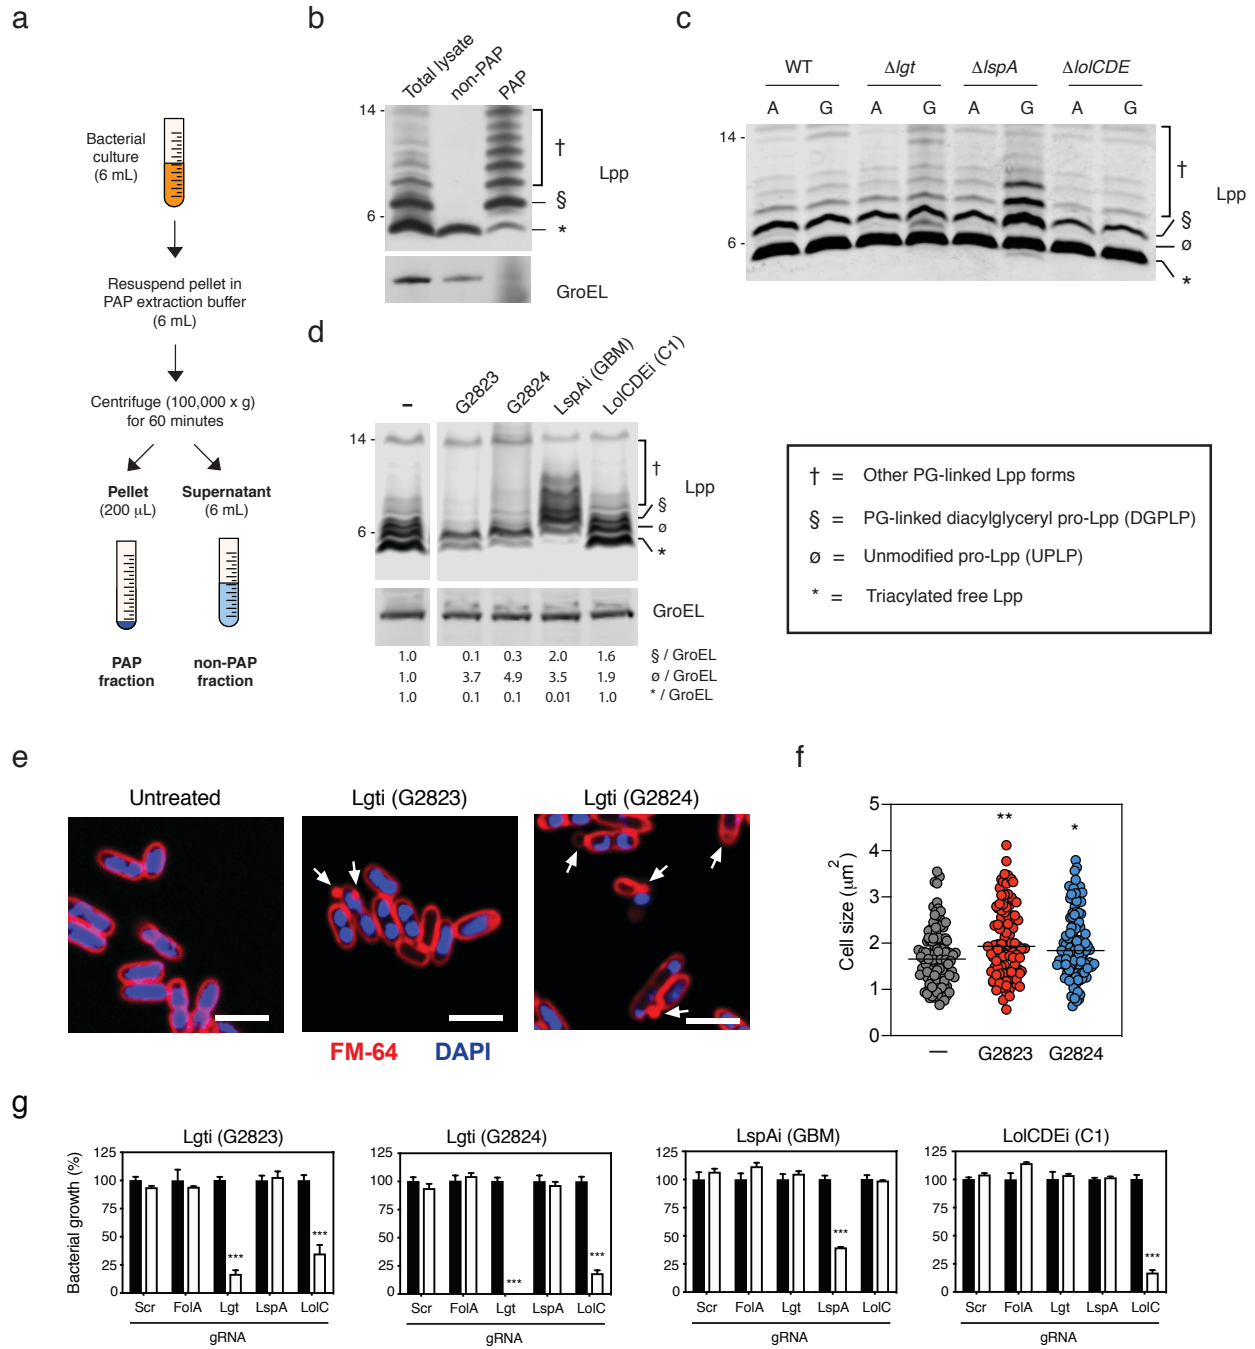

283

284



## Inhibition of Lgt in Gram-negative bacteria

285 Figure 4-figure supplement 2). As expected, decreased expression of *lspA* and *lolC* specifically led  
286 to enhanced growth inhibition by LspAi and LolCDEi compounds, respectively (Figure 4g and  
287 Figure 4-figure supplement 2a,b). Decreased *lolC* expression also sensitized cells to Lgti (Figure  
288 4g) and, at higher concentrations, LspAi (Figure 4-figure supplement 2d), but we confirmed that  
289 previously identified LolCDEi-resistant mutants were not cross-resistant to Lgti (Supplemental  
290 Table 1). Cumulatively, our data demonstrate that the novel Lgt-binding macrocycles G2823 and  
291 G2824 interfere with Lgt activity leading to inhibition of *E. coli* growth.

292

### 293 **Antibacterial activity of Lgti is not sensitive to *lpp* deletion.**

294 Our data with the inducible deletion strains (Figure 2h) suggested that the mechanism of cell death  
295 upon Lgt depletion is independent of Lpp (Figure 2h), distinguishing it from the mechanism of cell  
296 death after depletion of enzymes involved in later steps of lipoprotein biosynthesis. Since the Lgti  
297 identified in this study now allowed us to pharmacologically intervene at this step in the pathway,  
298 we compared the bactericidal activity of Lgti with that of LspAi and LolCDEi. We treated  
299 CFT073*imp4213* and CFT073*imp4213* $\Delta$ *lpp* cells with Lgti (G2824), LspAi (GBM) and LolCDEi  
300 (C1) at 2 $\times$ MIC of the respective inhibitors against CFT073*imp4213* and enumerated viable CFU  
301 counts. Consistent with our data using the inducible deletion strains, *lpp* deletion did not protect  
302 cells from Lgti (Figure 5a). In fact, the rate of CFU loss after Lgti treatment was more rapid in *lpp*-  
303 deleted cells, which is consistent with our data using the CFT073 $\Delta$ *lgt* cells (Figure 2h) and indicates  
304 a protective role for Lpp when targeting Lgt. As expected, inhibition of bacterial growth by LspAi  
305 and LolCDEi was lost in the absence of *lpp* (Figure 5b and 5c). In contrast, vancomycin showed  
306 equivalent killing of CFT073*imp4213* and CFT073*imp4213* $\Delta$ *lpp* at 5 hours post treatment (Figure

## Inhibition of Lgt in Gram-negative bacteria

307 5d). These data confirm that *lpp* deletion is not a mechanism of resistance to Lgti, and in fact  
 308 protects cells against depletion or inhibition of Lgti.

309

310 **Figure 5: *lpp* deletion does not rescue growth after Lgti treatment**

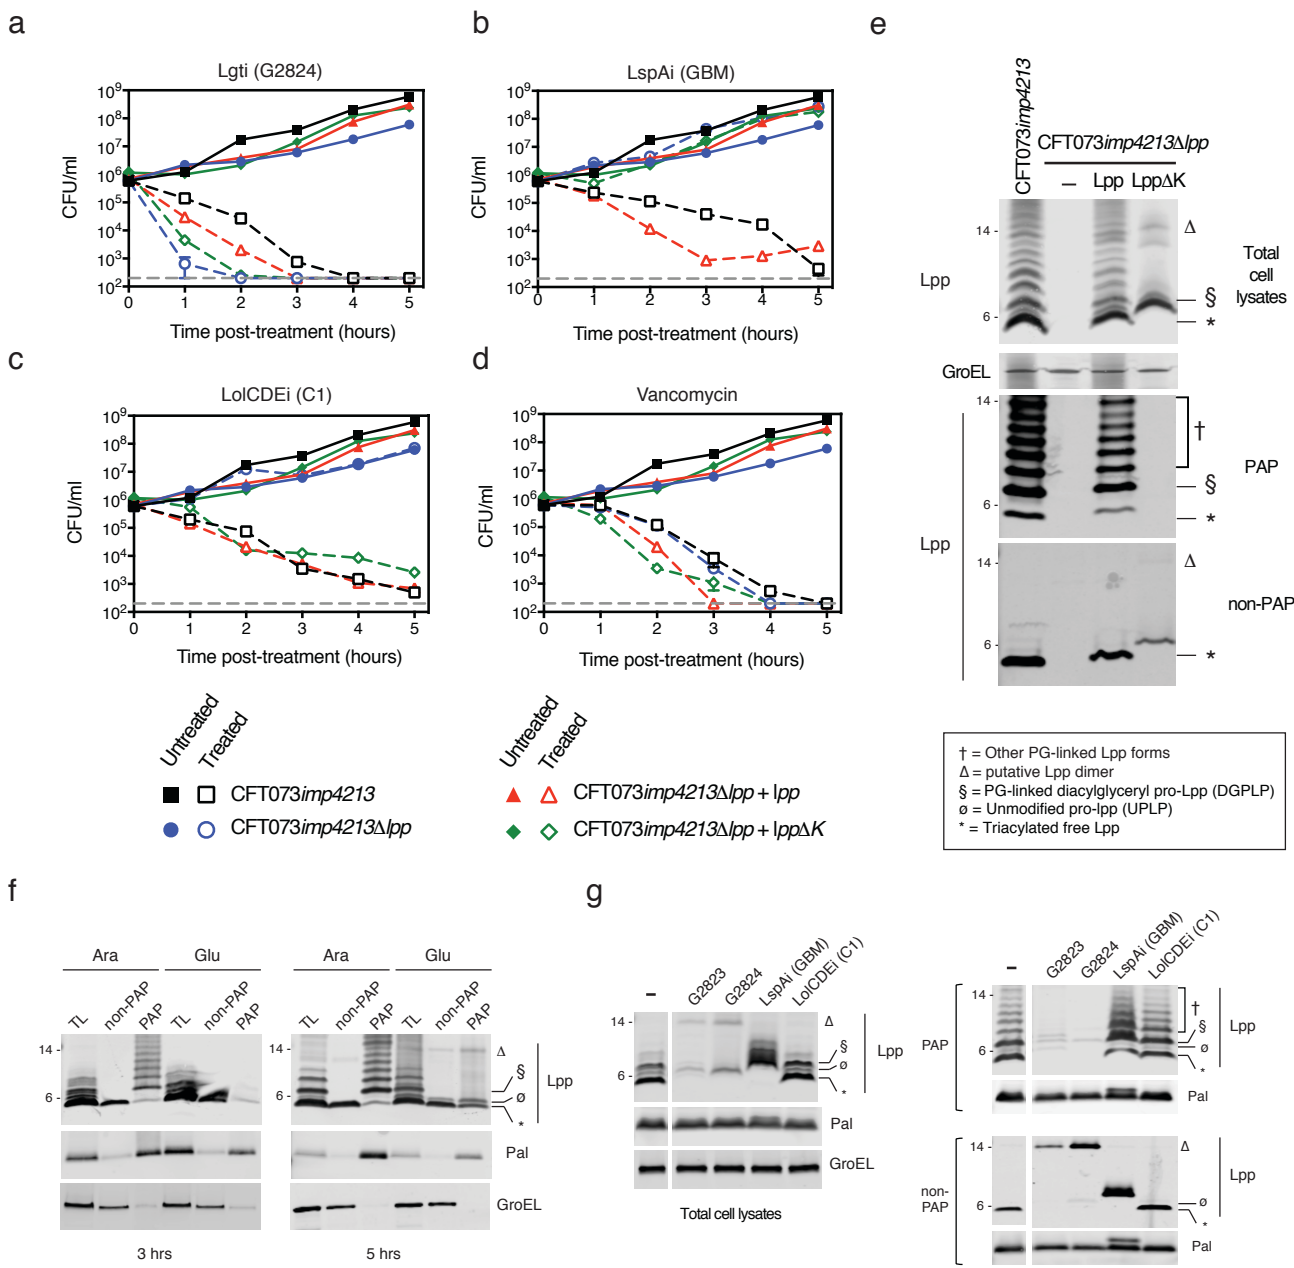

311

## Inhibition of Lgt in Gram-negative bacteria

312 To determine if PG-linkage of Lpp plays a role in protection against Lgti, we treated  
313 CFT073*imp4213Δlpp* cells complemented with either WT *lpp* or a mutant form that is unable to  
314 covalently link to PG (*lppΔK*). Using the previously described SDS fraction protocol, we  
315 confirmed that while WT Lpp localized to both PAP and non-PAP fractions, the LppΔK mutant was  
316 only detected in the non-PAP fraction (Figure 5e). As we noted earlier, PG-linked DGPLP (§) and  
317 other PG-linked Lpp forms (†) were primarily detectable in cell lysates and PAP fraction (Figure  
318 5e). While complementation of CFT073*imp4213Δlpp* with WT *lpp* led to increased bactericidal  
319 activity of LspAi and LolCDEi, bactericidal activity of Lgti and LolCDEi in cells deleted for *lpp* or  
320 those only expressing LppΔK was comparable (Figure 5a-c). These data suggest that while PG-  
321 linked Lpp is toxic to cells after treatment with LspAi, it functions as a protective mechanism  
322 against Lgti. Furthermore, accumulation of PG-linked Lpp does not fully explain the bactericidal  
323 activity of LolCDEi.

324

### 325 **Lgt depletion or inhibition leads to decreased PG-association of Lpp and Pal.**

326 Unlike with inhibitors of LspA (Yakushi, Tajima, Matsuyama, & Tokuda, 1997a) and LolCDE  
327 (Nickerson et al., 2018), Lpp protects cells from Lgti suggesting that the PG-linkage state and/or  
328 localization of Lpp must differ after treatment with Lgti. Using SDS fractionation to enrich for PG-  
329 associated proteins in the CFT073*Δlgt* inducible deletion strain, we find that while Lgt depletion  
330 leads to a significant loss of DGPLP and other PG-linked Lpp forms in the PAP fractions, there is a  
331 modest accumulation of UPLP in the PAP fraction (Figure 5f). Lgt depletion also led to decreased  
332 PG-associated Pal, although the difference between pro-Pal and mature Pal forms was difficult to  
333 distinguish by SDS-PAGE due to larger size of Pal compared to Lpp. We then tested if Lgti

## Inhibition of Lgt in Gram-negative bacteria

334 treatment also led to a similar loss of PG-association of Lpp and Pal. As before, we used cells  
335 expressing an inducible form of *lpp* (CFT073*imp4213Δlpp:lpp<sup>Ara</sup>*) and find that Lgti treatment leads  
336 to decreased PG-associated DGPLP and other PG-linked Lpp forms Lpp (Figure 5g). In addition,  
337 we also detect a modest decrease in PG-associated Pal (Figure 5g). As expected, LspAi treatment  
338 led to the accumulation of PG-linked DGPLP (§) and other PG-linked Lpp forms (†). These data  
339 suggest that the accumulated UPLP after Lgt inhibition is either not significantly linked to PG or  
340 does not accumulate to levels needed to induce cell death. To address the first question, we  
341 engineered cells to only express a mutant of Lpp that has the conserved cysteine modified  
342 (CFT073*imp4213Δlpp:lpp<sup>C21A</sup>*) and asked if this form was PG-linked. Lpp<sup>C21A</sup> cannot be modified  
343 by Lgt and represents the pro-Lpp substrate of Lgt. While complementation of  
344 CFT073*imp4213Δlpp* with WT Lpp led to normal PG-linkage, CFT073*imp4213Δlpp:lpp<sup>C21A</sup>* cells  
345 showed a significantly less PG-association of Lpp (Figure 5-figure supplement 1). Cumulatively,  
346 these data demonstrate that inhibition of Lgt leads to decreased PG-association of Lpp, which could  
347 explain why deletion of *lpp* does not lead to resistance to Lgti.

348

### 349 **Inhibition of Lgt does not lead to significant accumulation of PG-linked Lpp in the IM**

350 We then asked if membrane localization of Lpp, other OM lipoproteins and OMPs were affected by  
351 Lgti. We utilized sucrose gradient centrifugation to separate *E. coli* IM and OM and measured  
352 levels of OM lipoproteins (Lpp, Pal, BamD) and OMPs (BamA, OmpA) by Western blot analyses.  
353 Sucrose gradient centrifugation of CFT073*imp4213* cells membranes led to the efficient separation  
354 of IM and OM, as measured by MsbA and OmpA expression, respectively (Figure 6a). In  
355 comparison to untreated cells, Lgti treatment led to significant reductions of Lpp in the OM (Figure

## Inhibition of Lgt in Gram-negative bacteria

356 **Figure 6: Inhibition of Lgt leads to depletion of essential OM lipoproteins and OMPs and**  
 357 **minimal IM accumulation of PG-linked DGPLP**

a

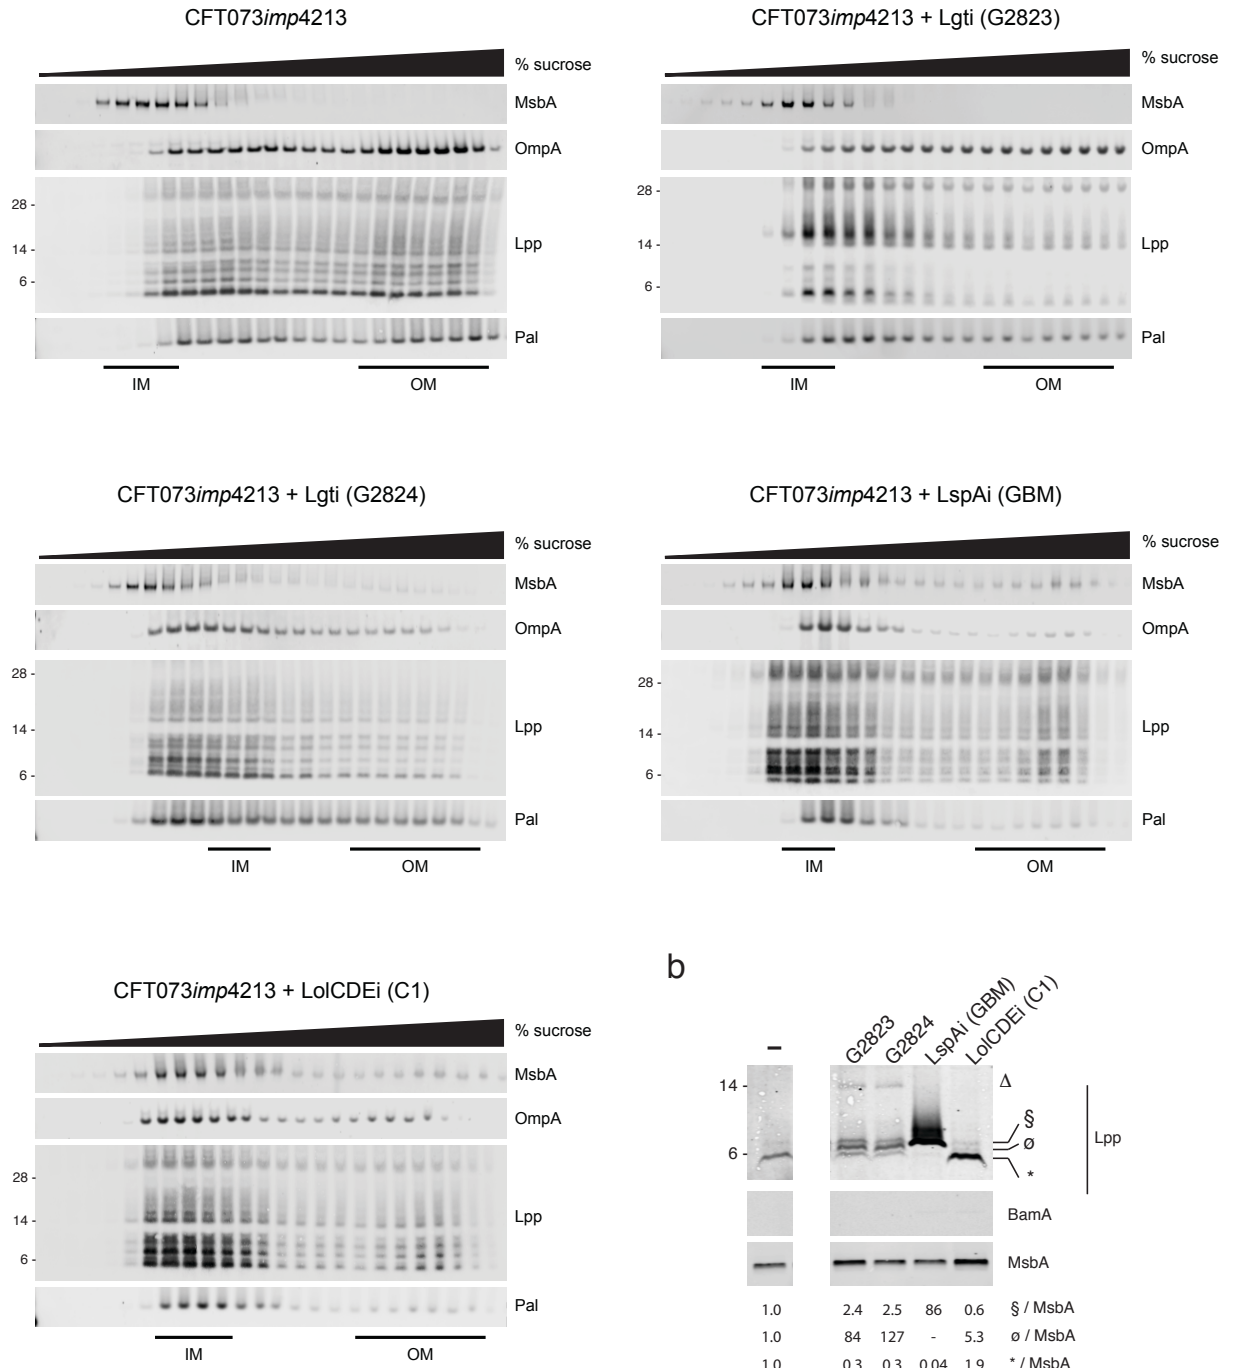

358

359

## Inhibition of Lgt in Gram-negative bacteria

360 6a). Although Lgti treatment led to accumulation of Lpp in the IM, the levels were significantly  
361 lower than that seen with LspAi and LolCDEi. All the inhibitors led to decreased OM localization  
362 of other lipoproteins, Pal and BamD, as well as the OM  $\beta$ -barrel proteins BamA and OmpA (Figure  
363 6 and Figure 6 – figure supplement 1). These results are not totally unexpected given OmpA  
364 insertion into the OM requires BamA function, which itself requires other Bam lipoproteins,  
365 including BamD, for proper OM localization. These results suggest that while Lgti are similar to  
366 LspAi and LolCDEi in their effects on Pal and other lipoproteins involved in OM biogenesis  
367 pathways, they differ from LspAi and LolCDEi in that they do not lead to significant accumulation  
368 of Lpp in the IM supporting our data that *lpp* deletion does not play major role in resistance to Lgti.

369 In addition to sucrose gradient centrifugation, we also treated cells with sarkosyl that  
370 specifically solubilizes the IM and has been used for IM proteomic analyses in multiple Gram-  
371 negative bacteria (Ferrer-Navarro, Ballesté-Delpierre, Vila, & Fàbrega, 2016; Filip, Fletcher, Wulff,  
372 & Earhart, 1973; Hobb, Fields, Burns, & Thompson, 2009; Jabbour et al., 2010). Compared to  
373 untreated cells, treatment with Lgti led to a ~84 to 127-fold increase in levels of UPLP in the IM. In  
374 contrast, DGPLP levels in the IM increased by a modest ~2.5-fold in comparison to LspAi  
375 treatment, which results in a ~86-fold increase of DGPLP in the IM (Figure 6b). These results  
376 confirm that Lgti treatment leads to minimal accumulation of inefficiently PG-linked UPLP in the  
377 IM, but no significant accumulation of other PG-linked Lpp forms, including the DGPLP.

378

379

380

## Inhibition of Lgt in Gram-negative bacteria

### 381 **Discussion**

382 Lipoprotein biosynthesis is a critical pathway involved in the biogenesis and maintenance of the  
383 Gram-negative bacterial OM, and disruption of any step in this pathway leads to loss of cell  
384 viability. Lpp maintains the integrity of the Gram-negative bacterial cell surface by covalent  
385 interaction between the C-terminal lysine and the *meso*-diaminopimelic acid residue of the PG layer  
386 (Braun & Wolff, 1970; Hirota, Suzuki, Nishimura, & Yasuda, 1977; H. Suzuki et al., 1978; Zhang  
387 & Wu, 1992; Zhang, Inouye, & Wu, 1992). Published data suggest that *lpp* deletion leads to rescue  
388 of growth after inhibition of LspA and LolCDE (McLeod et al., 2015; Nickerson et al., 2018; Xiao  
389 et al., 2012; Yakushi, Tajima, Matsuyama, & Tokuda, 1997a; Zwiebel et al., 1981) as well as rescue  
390 of the temperature-sensitive *Salmonella typhimurium lgt* and *lnt* mutants (Gan, Gupta, Sankaran,  
391 Schmid, & Wu, 1993; Gupta, Gan, Schmid, & Wu, 1993). While *E. coli lnt* is essential in the  
392 absence of *lpp* (Robichon et al., 2005), Lpp overexpression in the *E. coli lnt* mutant leads to  
393 bacterial cell growth arrest (Narita & Tokuda, 2011). Following up on data from Pailler et al., who  
394 demonstrated that *lgt* is essential in BW25113, a derivative of *E. coli* K-12 strain BD792, and that  
395 Lgt depletion leads to increased DNA leakage from the cell pole (Pailler et al., 2012), we  
396 demonstrate that Lgt depletion in the clinical *E. coli* strain CFT073 leads to significant perturbations  
397 to the bacterial cell envelope leading to increased sensitivity to antibiotics (Table 1), increased  
398 serum killing (Figure 2d) and attenuated virulence *in vivo* (Figure 2g).

399         Based on this information and published reports, we had expected that deletion of *lpp* would  
400 also lead to rescue of growth after depletion or pharmacologic inhibition of Lgt, but our data  
401 demonstrate Lpp is in fact protective in cells treated with Lgti (Figure 5) or after Lgt depletion in  
402 the CFT074Δ*lgt* inducible deletion strain (Figure 2h). Both Lgt depletion and inhibition leads to the

## Inhibition of Lgt in Gram-negative bacteria

403 loss of PG tethering to the OM mediated by Lpp and Pal (Figure 5). Data demonstrating that cells  
404 expressing the Lpp<sup>C21A</sup> mutant contain significantly less PG-linked Lpp further supports our  
405 conclusions that Lpp linkage to PG is negatively affected by Lgti. Although alternative hypotheses  
406 remain to be tested, our findings suggest that efficient crosslinking of Lpp to PG occurs only after  
407 diacylglycerol modification of lipoprotein substrates by Lgt. Given that Lpp is critical for cell  
408 envelope stiffness (Mathelié-Guinlet, Asmar, Collet, & Dufrêne, 2020), we propose that in the  
409 absence of significant accumulation of DGPLP or other PG-linked Lpp forms, Lpp is protective  
410 against Lgti bactericidal activity. While our data is consistent with a previous report demonstrating  
411 UPLP and DGPLP are both linked to a single muropeptide unit (M. Suzuki et al., 2002), we show  
412 that the level of PG-linkage is significantly less efficient in the absence of diacylglycerol  
413 modification of pro-Lpp. The consequence of these findings is that targeting Lgt as a novel  
414 antibacterial target would overcome a major liability of targeting other steps in the lipoprotein  
415 biosynthetic pathway, namely the off-target resistance mediated by *lpp* deletion (McLeod et al.,  
416 2015; Xiao et al., 2012; Zwiebel et al., 1981).

417 The Lgti identified in this study are the first described inhibitors of the first committed step  
418 in bacterial lipoprotein biosynthesis. G2823 and G2824 inhibit growth of WT *E. coli* and *A.*  
419 *baumannii*. We used a combination of biochemical and genetic strategies (Figure 3) to confirm  
420 these molecules function through inhibition of the diacylglycerol transferase activity of Lgt. First,  
421 the Lgti in this study were identified using a Lgt binding screen and confirmed to inhibit Lgt  
422 enzymatic function *in vitro*. Second, the multiple effects and phenotypes detected in Lgti-treated  
423 cells were recapitulated using *lgt* inducible deletion strains, strongly arguing against off-target  
424 effects as the main cause of cell death. While we were unable to raise on-target resistant mutants to  
425 any Lgti, one could speculate that if the Lgti bind to the conserved phosphatidylglycerol binding



## Inhibition of Lgt in Gram-negative bacteria

426 site in Lgt, mutations disrupting Lgti binding might result in loss of Lgt function leading to cell  
427 death. This hypothesis is actually consistent with data using globomycin or an improved analog  
428 ,G0790, which binds a highly conserved active site (Vogelely et al., 2016) and for which no on-  
429 target resistance mutations have ever been described (Lehman & Grabowicz, 2019; Pantua et al.,  
430 2020). As recent publications have revealed significant insights into the potential mechanisms of  
431 diacylglycerol modification by Lgt (Mao et al., 2016; Singh et al., 2019), further studies aimed at  
432 determining if these Lgti competitively inhibit binding of the phosphatidylglycerol or prolipoprotein  
433 substrates would be critical in better understanding the mechanism by which these molecules  
434 interfere with this critical OM biogenesis pathway. Although we do not detect MIC shifts with Lgti  
435 in cells overexpressing *lgt* (data not shown), drug resistance in *E. coli* after target overexpression  
436 can increase, remain unchanged or decrease depending on the balance between bacterial fitness  
437 costs and inhibition of enzymatic activity (Palmer & Kishony, 2014). One could speculate that even  
438 a modest inhibition of Lgt could lead to significant effects on OM integrity and cellular fitness  
439 which may counteract any resistance arising from *lgt* overexpression. While CRISPRi-mediated  
440 downregulation of *lgt* expression specifically sensitizes cells to Lgti but not LspAi or LolCDEi  
441 (Figure 4g), *lolC* downregulation increases sensitivity to growth inhibition by LolCDE, Lgti and, at  
442 higher concentrations, LspAi (Figure 4-supplement 1). It is possible that LolC depletion may  
443 increase the permeability of cells to Lgti and LspAi as Lol depletion by CRISPRi has been  
444 demonstrated to lead to increased risk of plasmolysis and membrane reorganization (Caro, Place, &  
445 Mekalanos, 2019). As with many early antibiotic leads, we cannot fully rule out that the Lgti  
446 identified in this study may have additional targets in bacterial cells at higher concentrations, but  
447 our data strongly suggest that Lgti concentrations that inhibit growth of OM-permeabilized *E. coli*  
448 are consistent with their inhibition of Lgt enzymatic activity.

## Inhibition of Lgt in Gram-negative bacteria

449 In addition to the fact that *lpp* deletion does not play a role in resistance to Lgti, our studies  
450 have uncovered additional novel findings that spur new questions and investigations. First, both  
451 Lgt depletion as well as pharmacologic inhibition of Lgt led to accumulation of a ~14 kDa Lpp  
452 isoform in the IM ( $\Delta$ , Figure 5f,g). While the identity or function of this Lpp form is unknown, its  
453 size and the fact that a Lpp form around the same molecular weight is also detected in cells  
454 expressing the Lpp $\Delta$ K mutant (Figure 5 – figure supplement 1) suggest that it could represent a  
455 stable Lpp dimer. While stable Lpp trimers have been described (Bjelić, Karshikoff, & Jelesarov,  
456 2006; Shu, Liu, Ji, & Lu, 2000), there is also evidence that Lpp can exist as a dimer (Chang, Lin,  
457 Wang, & Liao, 2012). Second, while our data suggest that the lack of diacylglycerol modification  
458 by Lgt generates a less optimal substrate for the L,D-transpeptidases that covalently link Lpp to PG,  
459 it does not rule out the possibility that PG-linkage may occur at or after modification by Lgt. Third,  
460 we demonstrate that LolCDEi remain bactericidal against cells expressing only Lpp $\Delta$ K. While the  
461 sucrose gradient and sarkosyl solubilization centrifugation studies demonstrate that LspAi treatment  
462 leads to accumulation of DGPLP in the IM (Figure 6), consistent with previous data with  
463 globomycin (M. Suzuki et al., 2002), no such accumulation is detected after treatment with  
464 LolCDEi. This raises the possibility that accumulation of either WT Lpp or Lpp $\Delta$ K could compete  
465 with less abundant essential OM lipoproteins for limited transport via LolCDE, which is consistent  
466 with our data demonstrating decreased OM localization of BamD after LolCDEi treatment (Figure 6  
467 – figure supplement 1). Lgti, like LspAi and LolCDEi, had significant effects on OM localization  
468 of the  $\beta$ -barrel protein, OmpA (Figure 6a), which is most likely due to decreased OM expression of  
469 BamD and consequently BamA (Figure 6 – figure supplement 1). These results inform us that  
470 while Lgti behave very similarly to LspAi and LolCDEi in terms of depleting OM lipoproteins and  
471 OMPs, their effects on Lpp set them apart from other inhibitors on this pathway.

## Inhibition of Lgt in Gram-negative bacteria

472            In summary, our study is the first to systematically differentiate the role of Lpp in targeting  
473 multiple steps of bacterial lipoprotein biosynthesis and transport. The loss of PG-association of Lpp  
474 and Pal, resulting from Lgt depletion or pharmacologic inhibition of Lgt, leads to significant OM  
475 defects. The identification and characterization of these Lgti validates Lgt as a novel and druggable  
476 antibacterial target and could serve as initial starting points for ongoing medicinal chemistry efforts  
477 to improve antibacterial potency and physiochemical properties. Our studies suggest that  
478 therapeutic targeting of Lgt over other steps in the lipoprotein biosynthesis and transport pathways  
479 might present a more favorable resistance profile and prevent the spread of multi-drug resistant  
480 bacterial infections.

481

482

483

484

485

486

487

488

489

490

## Inhibition of Lgt in Gram-negative bacteria

### 491 **Materials and Methods**

492

### 493 **Ethics statement**

494 All mice used in this study were housed and maintained at Genentech in accordance with American  
495 Association of Laboratory Animal Care guidelines. All experimental studies were conducted under  
496 protocol 13-0979A were approved by the Institutional Animal Care and Use Committee of  
497 Genentech Lab Animal Research and performed in an Association for Assessment and  
498 Accreditation of Laboratory Animal Care International (AAALAC)-accredited facility in  
499 accordance with the Guide for the Care and Use of Laboratory Animals and applicable laws and  
500 regulations.

501

### 502 **Antibodies**

503 The anti-Pal antibody was a generous gift from Dr. Shaw Warren (Massachusetts General Hospital).  
504 The anti-OmpA (Antibody Research Corporation), anti-GroEL (Enzo Life Sciences), anti-ThyA  
505 (GeneTex, Inc) and anti-His (Cell Signaling Technology) antibodies were obtained from  
506 commercial sources. Generation of anti-Lpp and anti-BamA antibodies has been previously  
507 described (Diao et al., 2017; Storek et al., 2018; 2019). Recombinant Lgt and BamD were used to  
508 generate rabbit polyclonal antibodies. Rabbit immunizations, generation of antisera and purification  
509 of rabbit polyclonal antibodies were performed as previously described for Lpp (Diao et al., 2017).

510

### 511 **Generation of bacterial strains and plasmids**

## Inhibition of Lgt in Gram-negative bacteria

512 Bacterial strains and plasmids used in this study are listed in Supplemental File 2. *E. coli* strain  
513 CFT073 (ATCC 700928) (Mobley et al., 1990) and MG1655 (ATCC 700926) were purchased from  
514 ATCC. Gene disruption in CFT073 was performed as previously described (Datsenko & Wanner,  
515 2000; Diao et al., 2017). CFT073 $\Delta$ *lgt* was generated based on the previously published protocol  
516 (Pailler et al., 2012) by retaining the *lgt* stop codon, which forms part of the *thyA* ribosomal binding  
517 site. The primers used to generate the CFT073 and MG1655 mutants are listed in Supplemental  
518 File 3. Plasmids pKD46 for the  $\lambda$  Red recombinase (Datsenko & Wanner, 2000; Diao et al., 2017),  
519 pKD4 or pSim18 for the integration construction (Datsenko & Wanner, 2000; Diao et al., 2017) and  
520 pCP20 (Cherepanov & Wackernagel, 1995) for the FLP recombinase were used in this study. The  
521 inducible deletion strains (MG1655 $\Delta$ *lgt*, MG1655 $\Delta$ *lspA* and MG1655 $\Delta$ *lolCDE*) in either the WT  
522 and/or  $\Delta$ *lpp* backgrounds were generated using similar methods as previously described (Diao et al.,  
523 2017; Noland et al., 2017). CFT073*imp4213* $\Delta$ *lpp* containing pBAD24-*lpp* was used to generate  
524 CFT073*imp4213* $\Delta$ *lpp*:*lpp*<sup>Ara</sup> to detect the different Lpp species after treatment with pharmacologic  
525 inhibitors. The PA14*imp4213* strain was generated based on published protocols (Balibar &  
526 Grabowicz, 2016; Hmelo et al., 2015). For expression under the IPTG-inducible promoter, DNA  
527 encoding the full-length sequences of *lgt*, *lspA*, *lnt* and *lolCDE* were cloned into pLMG18 and  
528 induced using 2.5 mM IPTG.

529

## 530 ***In vitro* growth inhibition and serum sensitivity assays**

531 Unless stated otherwise, *E. coli* cells were grown in Luria-Bertani (LB) medium (0.5% yeast  
532 extract, 1% tryptone, 0.5% NaCl) at 37°C. When indicated, kanamycin (Kan) was added to culture  
533 media at a 50  $\mu$ g/ml final concentration. MIC assays were performed based on Clinical and

## Inhibition of Lgt in Gram-negative bacteria

534 Laboratory Standards Institute (CLSI) guidelines. For *in vitro* growth curves, overnight cultures of  
535 WT CFT073, CFT073 $\Delta$ *lgt* and CFT073 $\Delta$ *lgt* complemented with *lgt* from *E. coli* (*lgt*<sup>Ec</sup>) or *P.*  
536 *aeruginosa* (*lgt*<sup>Pa</sup>) were grown to mid-exponential phase (OD<sub>600</sub>=0.6) and then diluted to  
537 OD<sub>600</sub>=0.1 to initiate growth curves. At various times, culture aliquots were diluted and plated in  
538 dilutions on LB+Kan agar and CFUs were enumerated in duplicate. Growth of MG1655 inducible  
539 deletion strains was measured by culturing in the presence of two-fold dilutions of arabinose  
540 (starting arabinose concentrations for CFT073 and MG1655 inducible deletion strains were 4% and  
541 0.8%, respectively). While 2% arabinose was sufficient for WT growth of MG1655 $\Delta$ *lgt*, 4%  
542 arabinose was used for CFT073 $\Delta$ *lgt* based on comparing its growth to that of WT CFT073 as  
543 measured by CFUs. OD<sub>600</sub> growth measurements were performed using an EnVision 2101  
544 Multilabel Reader plate reader (PerkinElmer) linked with Echo Liquid Handler (Labcyte). For  
545 time-kill experiments, bacteria were harvested in mid-exponential phase and treated with 12.5  $\mu$ M  
546 Lgti G2824, 3.2  $\mu$ M LspAi (GBM), 6.3  $\mu$ M LolCDEi (C1) and 1.6  $\mu$ M vancomycin. G2823 was  
547 not be tested due to limitations in compound availability. CFUs were enumerated at various times  
548 post treatment. Bacterial culture medium containing 2% arabinose was used to induce *lpp* or *lpp* $\Delta$ K  
549 expression from pBad24 plasmids. Bacterial viability at different time points during the treatment  
550 was measured by enumerating CFU. Serum killing assays were carried out as previously described  
551 (Diao et al., 2017).

552

## 553 **Detection of membrane permeability using SYTOX Green incorporation**

## Inhibition of Lgt in Gram-negative bacteria

554 To determine the effect of Lgt depletion on membrane permeability, WT CFT073 and CFT073 $\Delta$ lgt  
555 strains were streaked onto a LB agar plate containing 4% arabinose and cultured at 37°C for 18  
556 hours. From a single colony, bacteria were cultured in LB broth containing 4% arabinose and  
557 cultured at 37°C to OD 0.5. One mL cultures of OD=0.5 for both strains were harvested, washed  
558 and resuspended in LB broth or medium containing a range of arabinose (2, 0.2, 0.1, 0.05% and 0)  
559 or glucose (0.2%) concentrations and incubated at 37°C for 2 hours. Cells were harvested by  
560 centrifugation at 4000  $\times$  g at 4°C for 5 minutes. Intact CFT073 or CFT073 treated with 70%  
561 ethanol at RT for 15 minutes to permeabilize the cells were used as controls. Cells were incubated  
562 with SYTOX green following the manufacturer's recommendation, washed with PBS (3 $\times$ ) and  
563 fixed in 2% paraformaldehyde. SYTOX Green incorporation was measured by flow cytometry  
564 using a FACS Aria II (Becton Dickenson) and analyzed using Flowjo software.

565

## 566 **Mouse infection model**

567 Overnight bacterial cultures were back diluted 1:100 in M9 media and grown to an OD<sub>600</sub>=0.8-1 at  
568 37°C. Cells were harvested, washed once with PBS and resuspended in PBS containing 10%  
569 glycerol. Cells were frozen in aliquots and thawed aliquots were measured for CFUs prior to mouse  
570 infections. Virulence of WT CFT073 and CFT073 $\Delta$ lgt was measured using the neutropenic *E. coli*  
571 infection model (Cross, Siegel, Byrne, Trautmann, & Finbloom, 1989). Seven-week-old female A/J  
572 mice (Jackson Laboratory) were rendered neutropenic by peritoneal injection of 2 doses of  
573 cyclophosphamide (150 mg/kg on Day -4 and 100 mg/kg on Day -1). On Day 0, mice were  
574 infected with 5  $\times$  10<sup>5</sup> CFU of mid-exponential phase bacteria diluted in PBS by intravenous  
575 injection through the tail vein. At 30 minutes and 24 hours post infection, bacterial burden in the  
576 liver and spleen was determined by serial dilutions of tissue homogenates on LB plates.

## Inhibition of Lgt in Gram-negative bacteria

577

### 578 **Macrocyclic peptide library design and selection of Lgt-binding molecules**

579 A thioether-macrocyclic peptide library was constructed by using N-chloroacetyl D-phenylalanine  
580 (ClAc-f) as an initiator in a genetically reprogrammed *in vitro* translation system (Kashiwagi et al.,  
581 2013). The genetic code was designed with the addition of two N-methyl amino acids: N-methyl-L-  
582 phenylalanine (MeF) and N-methyl-L-glycine (MeG); and, three unnatural amino acids: (S)-2-  
583 aminoheptanoic acid (Ahp), (S)-3-([1,1'-biphenyl]-4-yl)-2-aminopropanoic acid (Bph), and (S)-  
584 1,2,3,4-tetrahydroisoquinoline-3-carboxylic acid (Tic) in addition to 11 natural amino acids (Ser,  
585 Tyr, Trp, Leu, Pro, His, Arg, Asn, Val, Asp, and Gly). After *in vitro* translation, a thioether bond  
586 formed spontaneously between the N-terminal ClAc group of the initiator D-phenylalanine residue  
587 and the sulfhydryl group of a downstream cysteine residue to generate the macrocyclic peptides.

588 Affinity selection of macrocyclic peptides binding to Lgt was performed using *E. coli* Lgt-  
589 biotin in 0.02% n-dodecyl  $\beta$ -D-maltoside (DDM). Briefly, 10  $\mu$ M mRNA library was hybridized  
590 with a peptide-linker (11  $\mu$ M) at RT for 3 minutes. The mRNA library was translated at 37°C for 30  
591 minutes in the reprogrammed *in vitro* translation system to generate the peptide-mRNA fusion  
592 library (Goto et al., 2011; Ishizawa et al., 2013). Each reaction contained 2  $\mu$ M mRNA-peptide-  
593 linker conjugate, 12.5  $\mu$ M initiator tRNA (tRNA<sup>fMet</sup> aminoacylated with ClAc-D-Phe), and 25  $\mu$ M  
594 of each elongator tRNA aminoacylated with the specified non-canonical /canonical amino acids. In  
595 the first round of selections, translation was performed at 20  $\mu$ L scale. After the translation, the  
596 reaction was quenched with 17 mM EDTA. The product was subsequently reverse-transcribed using  
597 RNase H minus reverse transcriptase (Promega) at 42°C for 30 minutes and buffer was exchanged  
598 for DDM buffer: 50 mM Tris (pH 8), 5 mM EDTA, 200 mM NaCl<sub>2</sub>, 0.02% DDM, and 1 mM



## Inhibition of Lgt in Gram-negative bacteria

599 Glutathione. For affinity selection, the peptide-mRNA/cDNA solution was incubated with 250 nM  
600 biotinylated *E. coli* Lgt for 60 minutes at 4°C and the streptavidin-coated beads (Dynabeads M-280  
601 Streptavidin, Thermo) were further added and incubated for 10 minutes to isolate Lgt binders. The  
602 beads were washed once with cold DDM buffer, the cDNA was eluted from the beads by heating  
603 for 5 minutes at 95°C, and fractional recovery from the affinity selection step were assessed by  
604 quantitative PCR using Sybr Green I on a LightCycler thermal cycler (Roche). After five rounds of  
605 affinity maturation, two additional rounds of off-rate selections were performed by increasing the  
606 wash stringency before elation to identify high affinity binders. Sequencing of the final enriched  
607 cDNA was carried out using a MiSeq next generation sequencer (Illumina).

608

## 609 **Peptide Synthesis**

610 Thioether macrocyclic peptides were synthesized using standard Fmoc solid phase peptide synthesis  
611 (SPPS). Following coupling of all amino acids, the deprotected N-terminus was chloroacetylated  
612 on-resin followed by global deprotection using a trifluoroacetic acid (TFA) deprotection cocktail.  
613 The peptides were then precipitated from the deprotection solution by adding over 10-fold excess  
614 diethyl ether. Crude peptide pellets were then dissolved and re-pelleted 3 times using diethyl ether.  
615 After the final wash, the pellet was left to dry and then the pellet was resuspended in DMSO  
616 followed by the addition of triethylamine for intramolecular cyclization via formation of a thioether  
617 bond between the thiol of the cysteine and N-terminal chloroacetyl group. Upon completion of  
618 cyclization, the reaction was quenched with AcOH and the cyclic peptide was purified using  
619 standard reverse-phase HPLC methods.

## Inhibition of Lgt in Gram-negative bacteria

620

### 621 **SDS-PAGE and Western immunoblotting**

622 Bacterial cell samples normalized for equivalent OD<sub>600</sub> and resuspended in Bugbuster lysis buffer  
623 (Fischer Scientific) with the addition of sample buffer (LI-COR), and separated by SDS-PAGE  
624 using 16% Tricine protein gels or NuPAGE 4-20% Bis-Tris gels (ThermoFisher Scientific) and  
625 transferred to nitrocellulose membranes using the iBlot™2 Dry Blotting system (Invitrogen) and  
626 blocked using LI-COR blocking buffer for 30 minutes. Unless stated otherwise, loading buffer with  
627 reducing agents were added and samples were not boiled prior to SDS-PAGE. For the sucrose  
628 gradient centrifugation, samples were boiled prior to running the SDS-PAGE. Primary antibodies  
629 were used at a final concentration of 1 µg/ml with some exceptions: rabbit anti-Lpp polyclonal  
630 antibody (0.1 µg/ml); murine anti-Pal 6D7 (0.5 µg/ml); rabbit anti-GroEL (1:10,000 final dilution);  
631 rabbit anti-OmpA (1:50,000 final dilution). The secondary antibodies were all obtained from LI-  
632 COR, and used as per manufacturer's instructions. Images were collected using the Odyssey CLx  
633 imaging system (LI-COR) and analyzed by Image Studio Lite.

634

635

### 636 **Expression and purification of recombinant Lgt and BamD**

637 DNA encoding full-length *E. coli* Lgt fused to a C-terminal Flag-tag was transformed into Rosetta  
638 2(DE3) Gold cells (Agilent). Starter cultures were grown in Terrific Broth (TB) media with  
639 carbenicillin (50 µg/mL) and chloramphenicol (12.5 µg/mL) at 37°C for 3 hours. The starter cultures  
640 were diluted 1:50 in TB medium with carbenicillin (50 µg/mL), chloramphenicol (12.5 µg/mL), and  
641 glycerol (1%) and grown at 37°C for 2 hours with shaking at 200 rpm. The temperature of the  
642 culture was reduced to 30°C and grown for an additional 2 hours before the temperature of the

## Inhibition of Lgt in Gram-negative bacteria

643 culture was reduced to 16°C and grown for 64 hours. The cells were harvested by centrifugation  
644 and resuspended into lysis buffer (20mM Tris, pH 8.0, 300mM NaCl, Protease Inhibitor cocktail  
645 and Lysonase) and stirred at 4°C for 30 minutes before being passed through a microfluidizer 3  
646 times. The membrane fraction was solubilized by adding DDM directly to the lysate to a final  
647 concentration of 1% and stirring at 4°C for 2 hours before centrifugation at 40,000 rpm for 1 hour.  
648 Pre-equilibrated FLAG resin was added to the supernatant and incubated with rotation at 4°C for 2  
649 hours. The slurry was added to a gravity column and the column was washed with 10 CV buffer A  
650 (20mM Tris, pH 8.0, 300mM NaCl, 5% glycerol, 1% DDM) and 10 CV buffer B (20mM Tris, pH  
651 8.0, 300mM NaCl, 5% glycerol, 0.05% DDM). The bound fraction was eluted by the addition of 5  
652 CV of buffer C (20mM Tris, pH 8.0, 300mM NaCl, 5% glycerol, 0.05% DDM, 100µg/mL FLAG  
653 peptide). The peak fractions were collected, concentrated to less than 5 mL and loaded onto a  
654 superdex 200 16/60 column equilibrated with buffer C (20mM Tris, pH 8.0, 300mM NaCl, 5%  
655 glycerol, 0.05% DDM, 1mM TCEP). The peak fractions were collected, analyzed by SDS-PAGE  
656 and stored at -80°C.

657 For recombinant *E. coli* BamD protein expression, DNA fragments encoding BamD (Gly<sub>22</sub>-  
658 Thr<sub>245</sub>) were cloned into a modified pET-52b expression vector containing an C-terminal His<sub>8</sub>-tag  
659 and overexpressed in *E. coli* host Rosetta 2 (DE3) grown by fermentation at 17°C for 64 hours, at  
660 which point cells were collected and resuspended in 50 mM Tris, pH 8.0, 300 mM NaCl, 0.5 mM  
661 TCEP containing cOmplete Protease Inhibitors (Roche), 1 mM PMSF and 2 U/ml of Benzonase  
662 nuclease (Sigma Aldrich). After cell lysis by microfluidization and low speed centrifugation,  
663 soluble protein was purified by Ni-NTA affinity and size exclusion chromatography. The peak  
664 fractions containing BamD were pooled and concentrated to 5 mg/mL.

665

## Inhibition of Lgt in Gram-negative bacteria

### 666 **Development of the Lgt biochemical assay**

667 The Lgt enzymatic activity was measured by specific detection of G3P. Both G3P and G1P are  
668 released from phosphatidylglycerol as Lgt catalyzes the transfer of diacylglyceryl from  
669 phosphatidylglycerol to the preprolipoprotein substrate, since the PG substrate used in the assay  
670 contains a racemic glycerol moiety at the end of phosphatidyl group. The standard assay consists of  
671 6  $\mu$ L reaction mixture with 3 nM Lgt-DDM, 50  $\mu$ M phosphatidylglycerol (1,2-dipalmitoyl-*sn*-  
672 glycerol-3-phospho-(1'-*rac*-glycerol), Avanti), 12.5  $\mu$ M Pal-IAAC peptide substrate derived from  
673 the Pal lipoprotein (MQLNKVLKGLMIALPVMIAIAACSSNKN, synthesized by CPC Scientific) in  
674 50 mM Tris, pH 8, 200 mM NaCl, 5 mM EDTA, 0.02% DDM, 0.05 % Bovine Skin Gelatin, and 1  
675 mM glutathione. As a control, we used a mutant non-modifiable Pal substrate peptide containing a  
676 cysteine to alanine mutation (Pal-IAAA) which served as a competitive non-modifiable inhibitor.  
677 The reaction was quenched after 60 minutes at RT with 0.5  $\mu$ L of 4.8% Lauryl Dimethylamine-N-  
678 Oxide (Anatrace), followed by addition of 6  $\mu$ L Detection Solution. After incubation for 120  
679 minutes at RT, the luminescence signal was read. The Detection Solution was modified based on a  
680 NAD Glo protocol (Promega, G9072), per manufacturer's instruction. Specifically, 10 mL  
681 Detection Solution consists of 3-fold dilution of Luciferin Detection Reagents, supplemented with  
682 10  $\mu$ L Reductase, 2.5  $\mu$ L Reductase Substrate, 1 mM NAD, and 4.25 U of G3PDH (Roche  
683 Diagnostics, 10127779001). The Luciferin Detection Reagents, Reductase, and Reductase Substrate  
684 were all from the NAD Glo kit (Promega). Luminescence values were normalized to DMSO  
685 controls (0% inhibition) and no enzyme controls (100% inhibition). IC<sub>50</sub> values were calculated  
686 using a 4 parameter logistic model using GraphPad Prism software.

687

### 688 **Visualization of WT CFT073 and CFT073 $\Delta$ lgt by time-lapse microscopy, confocal**

## Inhibition of Lgt in Gram-negative bacteria

### 689 **microcopy, transmission electron microscopy**

690 Electron microscopy was performed as previously described (Noland et al., 2017). For time-lapse  
691 microscopy, WT CFT073, CFT073 $\Delta$ *lgt* and CFT073 $\Delta$ *lgt* $\Delta$ *lpp* cells were grown overnight in LB  
692 medium containing 4% arabinose, back-diluted to a final OD<sub>600</sub> of 0.1 and immediately placed  
693 between a cover slip and 1% agarose pad containing 0.2% glucose for imaging. Cells were  
694 maintained at 37 °C during imaging in a stage top chamber (Okolab Inc.). Cells were imaged on a  
695 Nikon Eclipse Ti inverted confocal microscope (Nikon Instruments Inc.) coupled with a UltraVIEW  
696 VoX (PerkinElmer Inc.) and a 100 $\times$  (NA 1.40) oil-immersion objective. Images were captured at  
697 various times using ORCA-Flash 4.0 CMOS camera (Hamamatsu Photonics), collected using  
698 Volocity software (Quorum Technologies) and processed using Fiji (Schindelin et al., 2012). For  
699 confocal microscopy, images were acquired on a Leica SP8 STED 3x platform using a 100 $\times$  white  
700 light, NA:1.4 oil immersion objective. CFT073*imp4213* cells were treated with Lgti, LspAi or  
701 LolCDEi at 1 $\times$ MIC for 30 minutes, fixed with 4% paraformaldehyde and incubated with 1  $\mu$ g/mL  
702 FM-64 dye and 1  $\mu$ g/mL DAPI solution. Quantitation of bacterial cell area was performed using  
703 the ImageJ program by measuring at least ~100 bacterial cells from two independent experiments.

704

### 705 **Targeted downregulation of gene expression by CRISPRi**

706 The two-plasmid bacterial CRISPRi system pdCas9-bacteria\_GNE and pgRNA-bacteria\_GNE are  
707 based off the AddGene plasmids 44249 and 44251 (Qi et al., 2013), respectively. The plasmid was  
708 synthesized in smaller DNA fragments (500bp-3kb) (IDT gBlocks) and assembled by Gibson  
709 Assembly (NEB) according to manufacturer's protocols. Plasmids were confirmed by sequencing  
710 (ELIM Bio). gRNAs were designed to target the 5' end of the gene on the non-template strand  
711 using Benchling CRISPR software (Peters et al., 2016). gRNAs were cloned into pgRNA-bacteria

## Inhibition of Lgt in Gram-negative bacteria

712 using Gibson Assembly (NEB) according to manufacturer's protocols and sequence confirmed  
713 (ELIM Bio).

714 Bacterial cultures were grown overnight on LB agar supplemented with carbenicillin (50  
715 µg/mL) and chloramphenicol (12.5 µg/mL) to maintain both plasmids, pdCas9-bacteria and  
716 pgRNA-bacteria with each gRNA as appropriate. Cells were scraped from the plate into fresh  
717 media. OD<sub>600</sub> was measured and subsequently diluted to OD<sub>600</sub>=0.001 in the presence or absence of  
718 Lgti, LspAi and LolCDEi. 200 µL was transferred to a 96-well plate (Corning) and monitored for  
719 growth by measuring OD<sub>600</sub> (EnVision Multimode Plate Reader, PerkinElmer). All treatments were  
720 performed in triplicate. Specificity of CRISPRi downregulation was measured using RT-qPCR.

721

## 722 Purification of peptidoglycan-associated proteins

723 Purification of PG-associated proteins (PAP) was performed according to published methods (Diao  
724 et al., 2017; Nakae et al., 1979; Whitfield et al., 1983) with some modifications. Briefly, bacteria  
725 were harvested in mid-exponential phase for treatment and then subjected for PAP extraction by  
726 resuspended cell pellets from 10 OD (A<sub>600</sub>) in 6 mL of PAP extraction buffer containing 2%  
727 (wt/vol) SDS in 100 mM Tris-HCl (pH 8.0) with 100mM NaCl, 10% glycerol, and cOmplete™,  
728 mini, EDTA-free protease inhibitor cocktail (Sigma-Aldrich). After 60 minutes at RT, the  
729 extraction was subjected to centrifugation at 100,000 × g for 60 minutes at 22°C, and the pellet,  
730 containing PG and associated proteins, was washed once with the same PAP extraction buffer with  
731 centrifugation at 100,000 × g for 30 minutes and resuspended in 200 µL of PAP extraction buffer  
732 (referred to as the SDS-insoluble on PAP fraction). The supernatant containing the SDS-soluble  
733 fraction was aliquoted and frozen (referred to as non-PAP fraction). Both fractions were treated  
734 with equal volume of BugBuster buffer prior to the addition of sample buffer for Western

## Inhibition of Lgt in Gram-negative bacteria

735 immunoblotting as described above. It should be noted that the final PAP fractions are ~30-fold  
736 more concentrated than the non-PAP fractions.

737

### 738 **Isolation of *E. coli* IM and OM using sucrose gradient centrifugation and** 739 **sarkosyl fractionation**

740 Bacterial inner and outer membranes were separated by sucrose gradient as previously (Nickerson  
741 et al., 2018; Yakushi, Tajima, Matsuyama, & Tokuda, 1997b) with some modifications. Briefly,  
742 bacteria were grown in Luria broth at 37°C to mid-exponential phase ( $OD_{600}=0.6$ ), and then treated  
743 with 1×MIC of indicated inhibitors for 1 hour. Cells representing 30-40  $OD_{600}$  equivalents were  
744 harvested by centrifugation at  $4000 \times g$  for 15 minutes, washed once with 50 mM Tris-HCl (pH 7.5)  
745 containing 25% (wt/vol) sucrose and Complete EDTA-free protease inhibitor cocktail (Roche), and  
746 then incubated for 10 minutes at RT in the same buffer containing 100 µg/ml lysozyme (Thermo  
747 Scientific) and 1000 U/ml nuclease (BenzonaseNuclease, EMD Millipore). Two-fold volume of  
748 ice-cold EDTA (pH 8.0) was added and the suspension was disrupted by two passages through an  
749 LV1 Microfluidizer (Microfluidics). Unbroken cells were removed by centrifugation at  $4,000 \times g$   
750 and membranes were collected by ultracentrifugation at  $100,000 \times g$  for 1 hour and washed once  
751 with 50 mM Tris-HCl (pH 7.5). The final membrane preparation was resuspended in 50 mM Tris-  
752 HCl (pH 7.5) containing 10% sucrose, 1.5 mM EDTA and protease inhibitor cocktail and then  
753 applied to a 30 to 70% (wt/vol) sucrose gradient. The loaded gradients were spun at  $200,000 \times g$  for  
754 22 hours at 4°C in a Beckman SW41Ti rotor. Fractions were removed and analyzed by SDS-PAGE  
755 and immunoblotting with appropriate antibodies. The IM fractionation of bacterial cells using  
756 sarkosyl was performed according to published methods (Filip et al., 1973; Pantua et al., 2020)..

757

## Inhibition of Lgt in Gram-negative bacteria

### 758 **Statistical analyses**

759 All statistical analyses were performed using GraphPad Prism 6.0 software (GraphPad). The data  
760 was tested for being parametric and statistical analyses were performed on log-transformed data.  
761 All graphs represent the mean  $\pm$  the standard error of the mean (SEM). Unless stated otherwise, p  
762 values for all data were determined using regular unpaired *t* test (\* =  $p < 0.05$ , \*\* =  $p < 0.01$ , and \*\*\*  
763 =  $p < 0.001$ ). p values for mouse CFU studies were determined using the Mann Whitney Test.  
764 Bonferroni correction was applied to control for multiple comparisons for CRIPSRi data in Figure  
765 4g.

766

### 767 **Acknowledgements**

768 We thank Dr. Shaw Warren (Massachusetts General Hospital) for the anti-Pal antibody, Erin  
769 Dueber for help with purification of BamD, Scott Stawicki for assistance with generating the rabbit  
770 polyclonal antibodies, and Eric Brown for helpful comments and suggestions for the manuscript.

771

### 772 **Competing interests**

773 This study was supported by internal Genentech funds. All authors except R.K., T.S., H.I., H.O.,  
774 H.Y., J.N. and P.C.R. are employees of Genentech, a member of the Roche Group, and are  
775 shareholders of Roche. R.K., T.S., H.I., H.O., H.Y., J.N. and P.C.R. are employees of PeptiDream,  
776 Inc.

777

778

779



## Inhibition of Lgt in Gram-negative bacteria

### 780 **References**

- 781 Balibar, C. J., & Grabowicz, M. (2016). Mutant Alleles of lptD Increase the Permeability of  
782 *Pseudomonas aeruginosa* and Define Determinants of Intrinsic Resistance to Antibiotics.  
783 *Antimicrobial Agents and Chemotherapy*, 60(2), 845–854. [http://doi.org/10.1128/AAC.01747-](http://doi.org/10.1128/AAC.01747-15)  
784 15
- 785 Bjelić, S., Karshikoff, A., & Jelesarov, I. (2006). Stability and folding/unfolding kinetics of the  
786 homotrimeric coiled coil Lpp-56. *Biochemistry*, 45(29), 8931–8939.  
787 <http://doi.org/10.1021/bi0608156>
- 788 Braun, V., & Wolff, H. (1970). The murein-lipoprotein linkage in the cell wall of *Escherichia coli*.  
789 *European Journal of Biochemistry / FEBS*, 14(2), 387–391.
- 790 Caro, F., Place, N. M., & Mekalanos, J. J. (2019). Analysis of lipoprotein transport depletion in  
791 *Vibrio cholerae* using CRISPRi. *Proceedings of the National Academy of Sciences of the United*  
792 *States of America*, 116(34), 17013–17022. <http://doi.org/10.1073/pnas.1906158116>
- 793 Cascales, E., Bernadac, A., Gavioli, M., Lazzaroni, J.-C., & Llobes, R. (2002). Pal lipoprotein of  
794 *Escherichia coli* plays a major role in outer membrane integrity. *Journal of Bacteriology*,  
795 184(3), 754–759.
- 796 Chang, T.-W., Lin, Y.-M., Wang, C.-F., & Liao, Y.-D. (2012). Outer membrane lipoprotein Lpp is  
797 Gram-negative bacterial cell surface receptor for cationic antimicrobial peptides. *The Journal of*  
798 *Biological Chemistry*, 287(1), 418–428. <http://doi.org/10.1074/jbc.M111.290361>
- 799 Cherepanov, P. P., & Wackernagel, W. (1995). Gene disruption in *Escherichia coli*: TcR and KmR  
800 cassettes with the option of F<sub>1</sub>-catalyzed excision of the antibiotic-resistance determinant.  
801 *Gene*, 158(1), 9–14.
- 802 Clavel, T., Germon, P., Vianney, A., Portalier, R., & Lazzaroni, J. C. (1998). TolB protein of  
803 *Escherichia coli* K-12 interacts with the outer membrane peptidoglycan-associated proteins Pal,  
804 Lpp and OmpA. *Molecular Microbiology*, 29(1), 359–367.
- 805 Cowles, C. E., Li, Y., Semmelhack, M. F., Cristea, I. M., & Silhavy, T. J. (2011). The free and  
806 bound forms of Lpp occupy distinct subcellular locations in *Escherichia coli*. *Molecular*  
807 *Microbiology*, 79(5), 1168–1181. <http://doi.org/10.1111/j.1365-2958.2011.07539.x>
- 808 Cross, A. S., Siegel, G., Byrne, W. R., Trautmann, M., & Finbloom, D. S. (1989). Intravenous  
809 immune globulin impairs anti-bacterial defences of a cyclophosphamide-treated host. *Clinical*  
810 *and Experimental Immunology*, 76(2), 159–164.
- 811 Datsenko, K. A., & Wanner, B. L. (2000). One-step inactivation of chromosomal genes in  
812 *Escherichia coli* K-12 using PCR products. *Proceedings of the National Academy of Sciences of*  
813 *the United States of America*, 97(12), 6640–6645. <http://doi.org/10.1073/pnas.120163297>
- 814 Dev, I. K., Harvey, R. J., & Ray, P. H. (1985). Inhibition of prolipoprotein signal peptidase by  
815 globomycin. *The Journal of Biological Chemistry*, 260(10), 5891–5894.
- 816 Diao, J., Bouwman, C., Yan, D., Kang, J., Katakam, A. K., Liu, P., et al. (2017). Peptidoglycan  
817 Association of Murein Lipoprotein Is Required for KpsD-Dependent Group 2 Capsular  
818 Polysaccharide Expression and Serum Resistance in a Uropathogenic *Escherichia coli* Isolate.  
819 *mBio*, 8(3), e00603–17. <http://doi.org/10.1128/mBio.00603-17>
- 820 Ferrer-Navarro, M., Ballesté-Delpierre, C., Vila, J., & Fàbrega, A. (2016). Characterization of the  
821 outer membrane subproteome of the virulent strain *Salmonella Typhimurium* SL1344. *Journal*  
822 *of Proteomics*, 146, 141–147. <http://doi.org/10.1016/j.jprot.2016.06.032>

## Inhibition of Lgt in Gram-negative bacteria

- 823 Filip, C., Fletcher, G., Wulff, J. L., & Earhart, C. F. (1973). Solubilization of the cytoplasmic  
824 membrane of *Escherichia coli* by the ionic detergent sodium-lauryl sarcosinate. *Journal of*  
825 *Bacteriology*, *115*(3), 717–722.
- 826 Gan, K., Gupta, S. D., Sankaran, K., Schmid, M. B., & Wu, H. C. (1993). Isolation and  
827 characterization of a temperature-sensitive mutant of *Salmonella typhimurium* defective in  
828 prolipoprotein modification. *The Journal of Biological Chemistry*, *268*(22), 16544–16550.
- 829 Gan, K., Sankaran, K., Williams, M. G., Aldea, M., Rudd, K. E., Kushner, S. R., & Wu, H. C.  
830 (1995). The *umpA* gene of *Escherichia coli* encodes phosphatidylglycerol:prolipoprotein  
831 diacylglyceryl transferase (*lgt*) and regulates thymidylate synthase levels through translational  
832 coupling. *Journal of Bacteriology*, *177*(7), 1879–1882.
- 833 Gerth, K., Irschik, H., Reichenbach, H., & Trowitzsch, W. (1982). The myxovirescins, a family of  
834 antibiotics from *Myxococcus virescens* (Myxobacterales). *The Journal of Antibiotics*, *35*(11),  
835 1454–1459.
- 836 Goto, Y., Katoh, T., & Suga, H. (2011). Flexizymes for genetic code reprogramming. *Nature*  
837 *Protocols*, *6*(6), 779–790. <http://doi.org/10.1038/nprot.2011.331>
- 838 Gupta, S. D., Gan, K., Schmid, M. B., & Wu, H. C. (1993). Characterization of a temperature-  
839 sensitive mutant of *Salmonella typhimurium* defective in apolipoprotein N-acyltransferase. *The*  
840 *Journal of Biological Chemistry*, *268*(22), 16551–16556.
- 841 Hirota, Y., Suzuki, H., Nishimura, Y., & Yasuda, S. (1977). On the process of cellular division in  
842 *Escherichia coli*: a mutant of *E. coli* lacking a murein-lipoprotein. *Proceedings of the National*  
843 *Academy of Sciences of the United States of America*, *74*(4), 1417–1420.
- 844 Hmelo, L. R., Borlee, B. R., Almblad, H., Love, M. E., Randall, T. E., Tseng, B. S., et al. (2015).  
845 Precision-engineering the *Pseudomonas aeruginosa* genome with two-step allelic exchange.  
846 *Nature Protocols*, *10*(11), 1820–1841. <http://doi.org/10.1038/nprot.2015.115>
- 847 Hobb, R. I., Fields, J. A., Burns, C. M., & Thompson, S. A. (2009). Evaluation of procedures for  
848 outer membrane isolation from *Campylobacter jejuni*. *Microbiology (Reading, England)*,  
849 *155*(Pt 3), 979–988. <http://doi.org/10.1099/mic.0.024539-0>
- 850 Igarashi, M. (2019). New natural products to meet the antibiotic crisis: a personal journey. *The*  
851 *Journal of Antibiotics*, *72*(12), 890–898. <http://doi.org/10.1038/s41429-019-0224-6>
- 852 Inukai, M., Enokita, R., Torikata, A., Nakahara, M., Iwado, S., & Arai, M. (1978a). Globomycin, a  
853 new peptide antibiotic with spheroplast-forming activity. I. Taxonomy of producing organisms  
854 and fermentation. *The Journal of Antibiotics*, *31*(5), 410–420.  
855 <http://doi.org/10.7164/antibiotics.31.410>
- 856 Inukai, M., Nakajima, M., Osawa, M., Haneishi, T., & Arai, M. (1978b). Globomycin, a new  
857 peptide antibiotic with spheroplast-forming activity. II. Isolation and physico-chemical and  
858 biological characterization. *The Journal of Antibiotics*, *31*(5), 421–425.  
859 <http://doi.org/10.7164/antibiotics.31.421>
- 860 Ishizawa, T., Kawakami, T., Reid, P. C., & Murakami, H. (2013). TRAP display: a high-speed  
861 selection method for the generation of functional polypeptides. *Journal of the American*  
862 *Chemical Society*, *135*(14), 5433–5440. <http://doi.org/10.1021/ja312579u>
- 863 Jabbour, R. E., Wade, M. M., Deshpande, S. V., Stanford, M. F., Wick, C. H., Zulich, A. W., &  
864 Snyder, A. P. (2010). Identification of *Yersinia pestis* and *Escherichia coli* strains by whole cell  
865 and outer membrane protein extracts with mass spectrometry-based proteomics. *Journal of*  
866 *Proteome Research*, *9*(7), 3647–3655. <http://doi.org/10.1021/pr100402y>
- 867 Kashiwagi, K., Reid, C. P., & Inc, P. (2013). Rapid display method in translational synthesis of  
868 peptide.

## Inhibition of Lgt in Gram-negative bacteria

- 869 Kitamura, S., Owensby, A., Wall, D., & Wolan, D. W. (2018). Lipoprotein Signal Peptidase  
870 Inhibitors with Antibiotic Properties Identified through Design of a Robust In Vitro HT  
871 Platform. *Cell Chemical Biology*, 25(3), 301–308.e12.  
872 <http://doi.org/10.1016/j.chembiol.2017.12.011>
- 873 Kovacs-Simon, A., Titball, R. W., & Michell, S. L. (2011). Lipoproteins of bacterial pathogens.  
874 *Infection and Immunity*, 79(2), 548–561. <http://doi.org/10.1128/IAI.00682-10>
- 875 Kowata, H., Tochigi, S., Kusano, T., & Kojima, S. (2016). Quantitative measurement of the outer  
876 membrane permeability in *Escherichia coli* lpp and tol-pal mutants defines the significance of  
877 Tol-Pal function for maintaining drug resistance. *The Journal of Antibiotics*.  
878 <http://doi.org/10.1038/ja.2016.50>
- 879 Leduc, M., Ishidate, K., Shakibai, N., & Rothfield, L. (1992). Interactions of *Escherichia coli*  
880 membrane lipoproteins with the murein sacculus. *Journal of Bacteriology*, 174(24), 7982–7988.
- 881 Lehman, K. M., & Grabowicz, M. (2019). Countering Gram-Negative Antibiotic Resistance:  
882 Recent Progress in Disrupting the Outer Membrane with Novel Therapeutics. *Antibiotics*  
883 (*Basel, Switzerland*), 8(4), 163. <http://doi.org/10.3390/antibiotics8040163>
- 884 Mao, G., Zhao, Y., Kang, X., Li, Z., Zhang, Y., Wang, X., et al. (2016). Crystal structure of *E. coli*  
885 lipoprotein diacylglyceryl transferase. *Nature Communications*, 7, 10198.  
886 <http://doi.org/10.1038/ncomms10198>
- 887 Mathelié-Guinlet, M., Asmar, A. T., Collet, J.-F., & Dufrêne, Y. F. (2020). Lipoprotein Lpp  
888 regulates the mechanical properties of the *E. coli* cell envelope. *Nature Communications*, 11(1),  
889 1789–11. <http://doi.org/10.1038/s41467-020-15489-1>
- 890 McLeod, S. M., Fleming, P. R., MacCormack, K., McLaughlin, R. E., Whiteaker, J. D., Narita, S.-  
891 I., et al. (2015). Small molecule inhibitors of Gram-negative lipoprotein trafficking discovered  
892 by phenotypic screening. *Journal of Bacteriology*, 197(6), JB.02352–14–1082.  
893 <http://doi.org/10.1128/JB.02352-14>
- 894 Mizuno, T. (1979). A novel peptidoglycan-associated lipoprotein found in the cell envelope of  
895 *Pseudomonas aeruginosa* and *Escherichia coli*. *Journal of Biochemistry*, 86(4), 991–1000.
- 896 Mobley, H. L., Green, D. M., Trifillis, A. L., Johnson, D. E., Chippendale, G. R., Lockett, C. V.,  
897 et al. (1990). Pyelonephritogenic *Escherichia coli* and killing of cultured human renal proximal  
898 tubular epithelial cells: role of hemolysin in some strains. *Infection and Immunity*, 58(5), 1281–  
899 1289.
- 900 Nakae, T., Ishii, J., & Tokunaga, M. (1979). Subunit structure of functional porin oligomers that  
901 form permeability channels in the outer membrane of *Escherichia coli*. *The Journal of*  
902 *Biological Chemistry*, 254(5), 1457–1461.
- 903 Narita, S.-I. (2011). ABC transporters involved in the biogenesis of the outer membrane in gram-  
904 negative bacteria. *Bioscience, Biotechnology, and Biochemistry*, 75(6), 1044–1054.  
905 <http://doi.org/10.1271/bbb.110115>
- 906 Narita, S.-I., & Tokuda, H. (2010). Sorting of bacterial lipoproteins to the outer membrane by the  
907 Lol system. *Methods in Molecular Biology (Clifton, NJ)*, 619(Chapter 7), 117–129.  
908 [http://doi.org/10.1007/978-1-60327-412-8\\_7](http://doi.org/10.1007/978-1-60327-412-8_7)
- 909 Narita, S.-I., & Tokuda, H. (2011). Overexpression of LolCDE allows deletion of the *Escherichia*  
910 *coli* gene encoding apolipoprotein N-acyltransferase. *Journal of Bacteriology*, 193(18), 4832–  
911 4840. <http://doi.org/10.1128/JB.05013-11>
- 912 Neidhardt, F. C. (1996). Chemical composition of *Escherichia coli*. In *Escherichia coli and*  
913 *Salmonella: cellular and molecular biology* (2nd ed., pp. 1035–1063). Washington D.C.

## Inhibition of Lgt in Gram-negative bacteria

- 914 Nickerson, N. N., Jao, C. C., Xu, Y., Quinn, J., Skippington, E., Alexander, M. K., et al. (2018). A  
915 Novel Inhibitor of the LolCDE ABC Transporter Essential for Lipoprotein Trafficking in  
916 Gram-Negative Bacteria. *Antimicrobial Agents and Chemotherapy*, 62(4), e02151–17.  
917 <http://doi.org/10.1128/AAC.02151-17>
- 918 Noland, C. L., Kattke, M. D., Diao, J., Gloor, S. L., Pantua, H., Reichelt, M., et al. (2017).  
919 Structural insights into lipoprotein N-acylation by Escherichia coli apolipoprotein N-  
920 acyltransferase. *Proceedings of the National Academy of Sciences of the United States of*  
921 *America*, 114(30), E6044–E6053. <http://doi.org/10.1073/pnas.1707813114>
- 922 Olatunji, S., Yu, X., Bailey, J., Huang, C.-Y., Zapotoczna, M., Bowen, K., et al. (2020). Structures  
923 of lipoprotein signal peptidase II from Staphylococcus aureus complexed with antibiotics  
924 globomycin and myxovirescin. *Nature Communications*, 11(1), 140–11.  
925 <http://doi.org/10.1038/s41467-019-13724-y>
- 926 Pailer, J., Aucher, W., Pires, M., & Buddelmeijer, N. (2012). Phosphatidylglycerol::prolipoprotein  
927 diacylglyceryl transferase (Lgt) of Escherichia coli has seven transmembrane segments, and its  
928 essential residues are embedded in the membrane. *Journal of Bacteriology*, 194(9), 2142–2151.  
929 <http://doi.org/10.1128/JB.06641-11>
- 930 Palmer, A. C., & Kishony, R. (2014). Opposing effects of target overexpression reveal drug  
931 mechanisms. *Nature Communications*, 5, 4296. <http://doi.org/10.1038/ncomms5296>
- 932 Pantua, H., Skippington, E., braun, M.-G., Noland, C. L., Diao, J., peng, Y., et al. (2020). Unstable  
933 Mechanisms of Resistance to Inhibitors of Escherichia coli Lipoprotein Signal Peptidase. *mBio*,  
934 11(5), VMBF–0016–2015. <http://doi.org/10.1128/mBio.02018-20>
- 935 Peters, J. M., Colavin, A., Shi, H., Czarny, T. L., Larson, M. H., Wong, S., et al. (2016). A  
936 Comprehensive, CRISPR-based Functional Analysis of Essential Genes in Bacteria. *Cell*,  
937 165(6), 1493–1506. <http://doi.org/10.1016/j.cell.2016.05.003>
- 938 Qi, L. S., Larson, M. H., Gilbert, L. A., Doudna, J. A., Weissman, J. S., Arkin, A. P., & Lim, W. A.  
939 (2013). Repurposing CRISPR as an RNA-guided platform for sequence-specific control of gene  
940 expression. *Cell*, 152(5), 1173–1183. <http://doi.org/10.1016/j.cell.2013.02.022>
- 941 Robichon, C., Vidal-Ingigliardi, D., & Pugsley, A. P. (2005). Depletion of apolipoprotein N-  
942 acyltransferase causes mislocalization of outer membrane lipoproteins in Escherichia coli. *The*  
943 *Journal of Biological Chemistry*, 280(2), 974–983. <http://doi.org/10.1074/jbc.M411059200>
- 944 Rojas, E. R., Billings, G., Odermatt, P. D., Auer, G. K., Zhu, L., Miguel, A., et al. (2018). The outer  
945 membrane is an essential load-bearing element in Gram-negative bacteria. *Nature*, 559(7715),  
946 617–621. <http://doi.org/10.1038/s41586-018-0344-3>
- 947 Rossiter, S. E., Fletcher, M. H., & Wuest, W. M. (2017). Natural Products as Platforms To  
948 Overcome Antibiotic Resistance. *Chemical Reviews*, 117(19), 12415–12474.  
949 <http://doi.org/10.1021/acs.chemrev.7b00283>
- 950 Rousset, F., Cui, L., Siouve, E., Becavin, C., Depardieu, F., & Bikard, D. (2018). Genome-wide  
951 CRISPR-dCas9 screens in E. coli identify essential genes and phage host factors. *PLoS*  
952 *Genetics*, 14(11), e1007749. <http://doi.org/10.1371/journal.pgen.1007749>
- 953 Ruiz, N., Falcone, B., Kahne, D., & Silhavy, T. J. (2005). Chemical conditionality: a genetic  
954 strategy to probe organelle assembly. *Cell*, 121(2), 307–317.  
955 <http://doi.org/10.1016/j.cell.2005.02.014>
- 956 Sankaran, K., & Wu, H. C. (1994). Lipid modification of bacterial prolipoprotein. Transfer of  
957 diacylglyceryl moiety from phosphatidylglycerol. *The Journal of Biological Chemistry*,  
958 269(31), 19701–19706.

## Inhibition of Lgt in Gram-negative bacteria

- 959 Schindelin, J., Arganda-Carreras, I., Frise, E., Kaynig, V., Longair, M., Pietzsch, T., et al. (2012).  
960 Fiji: an open-source platform for biological-image analysis. *Nature Methods*, 9(7), 676–682.  
961 <http://doi.org/10.1038/nmeth.2019>
- 962 Schlesinger, M. J. (1992). *Lipid Modifications of Proteins*. CRC Press.
- 963 Shu, W., Liu, J., Ji, H., & Lu, M. (2000). Core structure of the outer membrane lipoprotein from  
964 *Escherichia coli* at 1.9 Å resolution. *Journal of Molecular Biology*, 299(4), 1101–1112.  
965 <http://doi.org/10.1006/jmbi.2000.3776>
- 966 Silhavy, T. J., Kahne, D., & Walker, S. (2010). The bacterial cell envelope. *Cold Spring Harbor  
967 Perspectives in Biology*, 2(5), a000414–a000414. <http://doi.org/10.1101/cshperspect.a000414>
- 968 Singh, W., Bilal, M., McClory, J., Dourado, D., Quinn, D., Moody, T. S., et al. (2019). Mechanism  
969 of Phosphatidylglycerol Activation Catalyzed by Prolipoprotein Diacylglyceryl Transferase.  
970 *The Journal of Physical Chemistry. B*, 123(33), 7092–7102.  
971 <http://doi.org/10.1021/acs.jpcc.9b04227>
- 972 Stoll, H., Dengjel, J., Nerz, C., & Götz, F. (2005). *Staphylococcus aureus* deficient in lipidation of  
973 prelipoproteins is attenuated in growth and immune activation. *Infection and Immunity*, 73(4),  
974 2411–2423. <http://doi.org/10.1128/IAI.73.4.2411-2423.2005>
- 975 Storek, K. M., Auerbach, M. R., Shi, H., Garcia, N. K., Sun, D., Nickerson, N. N., et al. (2018).  
976 Monoclonal antibody targeting the  $\beta$ -barrel assembly machine of *Escherichia coli* is  
977 bactericidal. *Proceedings of the National Academy of Sciences of the United States of America*,  
978 115(14), 3692–3697. <http://doi.org/10.1073/pnas.1800043115>
- 979 Storek, K. M., Chan, J., Vij, R., Chiang, N., Lin, Z., Bevers, J., et al. (2019). Massive antibody  
980 discovery used to probe structure-function relationships of the essential outer membrane protein  
981 LptD. *eLife*, 8, 3002. <http://doi.org/10.7554/eLife.46258>
- 982 Suzuki, H., Nishimura, Y., Yasuda, S., Nishimura, A., Yamada, M., & Hirota, Y. (1978). Murein-  
983 lipoprotein of *Escherichia coli*: a protein involved in the stabilization of bacterial cell envelope.  
984 *Molecular & General Genetics : MGG*, 167(1), 1–9.
- 985 Suzuki, M., Hara, H., & Matsumoto, K. (2002). Envelope disorder of *Escherichia coli* cells lacking  
986 phosphatidylglycerol. *Journal of Bacteriology*, 184(19), 5418–5425.  
987 <http://doi.org/10.1128/jb.184.19.5418-5425.2002>
- 988 Tokunaga, M., Tokunaga, H., & Wu, H. C. (1982). Post-translational modification and processing  
989 of *Escherichia coli* prolipoprotein in vitro. *Proceedings of the National Academy of Sciences of  
990 the United States of America*, 79(7), 2255–2259. <http://doi.org/10.1073/pnas.79.7.2255>
- 991 Vogeley, L., Arnaout, El, T., Bailey, J., Stansfeld, P. J., Boland, C., & Caffrey, M. (2016).  
992 Structural basis of lipoprotein signal peptidase II action and inhibition by the antibiotic  
993 globomycin. *Science (New York, N.Y.)*, 351(6275), 876–880.  
994 <http://doi.org/10.1126/science.aad3747>
- 995 Whitfield, C., Hancock, R. E., & Costerton, J. W. (1983). Outer membrane protein K of *Escherichia  
996 coli*: purification and pore-forming properties in lipid bilayer membranes. *Journal of  
997 Bacteriology*, 156(2), 873–879.
- 998 Wilson, M. M., & Bernstein, H. D. (2015). Surface-Exposed Lipoproteins: An Emerging Secretion  
999 Phenomenon in Gram-Negative Bacteria. *Trends in Microbiology*.  
1000 <http://doi.org/10.1016/j.tim.2015.11.006>
- 1001 Xiao, Y., Gerth, K., Müller, R., & Wall, D. (2012). Myxobacterium-produced antibiotic TA  
1002 (myxovirescin) inhibits type II signal peptidase. *Antimicrobial Agents and Chemotherapy*,  
1003 56(4), 2014–2021. <http://doi.org/10.1128/AAC.06148-11>

## Inhibition of Lgt in Gram-negative bacteria

- 1004 Yakushi, T., Tajima, T., Matsuyama, S., & Tokuda, H. (1997a). Lethality of the covalent linkage  
1005 between mislocalized major outer membrane lipoprotein and the peptidoglycan of *Escherichia*  
1006 *coli*. *Journal of Bacteriology*, *179*(9), 2857–2862.
- 1007 Yakushi, T., Tajima, T., Matsuyama, S., & Tokuda, H. (1997b). Lethality of the covalent linkage  
1008 between mislocalized major outer membrane lipoprotein and the peptidoglycan of *Escherichia*  
1009 *coli*. *Journal of Bacteriology*, *179*(9), 2857–2862.
- 1010 Yem, D. W., & Wu, H. C. (1978). Physiological characterization of an *Escherichia coli* mutant  
1011 altered in the structure of murein lipoprotein. *Journal of Bacteriology*, *133*(3), 1419–1426.
- 1012 Zhang, W. Y., & Wu, H. C. (1992). Alterations of the carboxyl-terminal amino acid residues of  
1013 *Escherichia coli* lipoprotein affect the formation of murein-bound lipoprotein. *The Journal of*  
1014 *Biological Chemistry*, *267*(27), 19560–19564.
- 1015 Zhang, W. Y., Inouye, M., & Wu, H. C. (1992). Neither lipid modification nor processing of  
1016 prolipoprotein is essential for the formation of murein-bound lipoprotein in *Escherichia coli*.  
1017 *The Journal of Biological Chemistry*, *267*(27), 19631–19635.
- 1018 Zwiebel, L. J., Inukai, M., Nakamura, K., & Inouye, M. (1981). Preferential selection of deletion  
1019 mutations of the outer membrane lipoprotein gene of *Escherichia coli* by globomycin. *Journal*  
1020 *of Bacteriology*, *145*(1), 654–656.
- 1021

1022

1023

1024

1025

1026

1027

1028

1029

1030

1031

1032

1033

## Inhibition of Lgt in Gram-negative bacteria

### 1034 **Figure legends**

1035

1036 **Figure 1: Lipoprotein biosynthesis and transport in Gram-negative bacteria.** Prolipoprotein  
1037 substrates translocate through the IM via the Sec or Tat pathway and are sequentially modified by  
1038 Lgt, LspA and Lnt. Triacylated lipoproteins that are destined for the OM are recognized by the Lol  
1039 system (LolABCDE) and transported to the OM. Lpp and Pal are two OM lipoproteins that tether  
1040 the OM to the PG layer. Pal also binds to TolB, which also can interact with Lpp and OmpA, an  
1041 OM  $\beta$ -barrel protein that can also associate with PG (not shown).

1042

1043 **Figure 2: Lgt is essential for *in vitro* growth, membrane integrity, serum resistance and**  
1044 **virulence. (a)** CFT073 $\Delta$ *lgt* cells were grown in the presence of 4% arabinose (red circles) or 0.2%  
1045 glucose (grey circles) and CFUs were enumerated over 7 hours post treatment. CFT073 $\Delta$ *lgt*  
1046 cultured in the presence of 0.2% glucose were complemented with empty pLMG18 plasmid (open  
1047 green triangles) or pLMG18 plasmids expressing *lgt* from *E. coli* (blue circles), *A. baumannii*  
1048 (magenta circles) or *P. aeruginosa* (orange circles). The grey dashed line represents the limit of  
1049 detection (200 CFU/ml) of the experiment. Data are representative of two independent experiments  
1050 each performed in duplicate. **(b-c)** A modest ~25% reduction in Lgt levels results in a significant  
1051 loss in viability over time with a concurrent accumulation of the unmodified pro-Lpp ( $\emptyset$ , UPLP).  
1052 CFT073 $\Delta$ *lgt* cells were treated with a range of arabinose concentrations and CFUs were enumerated  
1053 over 20 hours. CFU growth data are representative of two independent experiments each performed  
1054 in duplicate. Western blot analysis for expression of Lgt and Lpp was performed using WT

## Inhibition of Lgt in Gram-negative bacteria

1055 CFT073 and CFT073 $\Delta$ *lgt* total cell lysates harvested at 3 hours post arabinose treatment. To  
1056 quantitate Lgt expression levels, Lgt levels were normalized to GroEL and quantitated as fold  
1057 change relative to WT CFT073 (FC vs WT). Lpp forms are denoted as follows: \* = triacylated free  
1058 Lpp; § = PG-linked diacylglyceryl pro-Lpp (DGPLP); ø = unmodified pro-Lpp (UPLP). Data are  
1059 representative of two independent experiments. **(d)** Lgt depletion leads to increased serum  
1060 sensitivity. WT CFT073 and CFT073 $\Delta$ *lgt* cells grown in the presence of a range of arabinose  
1061 concentrations (2% = magenta; 0.2% = light blue; 0.1% = green and 0.05% = orange) were  
1062 incubated with 50% normal human serum (nHS), heat inactivated human serum (HIHS) or medium  
1063 (no serum) for 1 hour and CFUs were enumerated. Data are representative of at least three  
1064 independent experiments each performed in duplicate. **(e)** Lgt depletion leads to increased OM  
1065 permeability. WT CFT073 and CFT073 $\Delta$ *lgt* cells were incubated with the same range of arabinose  
1066 concentrations as in Figure 2d and incubated with the nucleic acid dye, SYTOX Green, and flow  
1067 cytometry was performed to determine level of dye incorporation. While SYTOX Green does not  
1068 efficiently incorporate in bacterial cells with an intact OM (CFT073 $\Delta$ *lgt* treated with 2% arabinose,  
1069 magenta), SYTOX Green incorporation in bacterial cells increases after Lgt depletion. Intact  
1070 CFT073 (WT, grey) or CFT073 treated with 70% ethanol (WT+ETOH, black), which permeabilizes  
1071 the cells, were used as controls. Data are representative of two independent experiments. **(f)** Lgt  
1072 depletion results in a globular cellular phenotype and membrane blebbing. WT CFT073 or  
1073 CFT073 $\Delta$ *lgt* cells were grown in either arabinose or glucose for 4 hours, fixed and incubated with  
1074 FM-64 dye (red) and DAPI (blue) to detect OM and nucleic acids, respectively. Cells were  
1075 visualized by confocal microscopy. Arrows represent membrane blebs. Scale bars represent 1  $\mu$ m.  
1076 Quantitation of cell size was performed using ImageJ software. **(g)** Lgt depletion leads to  
1077 significant attenuation in virulence. Intravenous infection of neutropenic A/J mice with WT



## Inhibition of Lgt in Gram-negative bacteria

1078 CFT073 (black) or CFT073 $\Delta$ *lgt* (red) cells. At 0.5 hours and 24 hours post-infection, bacterial  
1079 burden in the liver and spleen were enumerated. Overall *p*-value for the ANOVA is *p* < 0.0001.  
1080 Pairwise comparisons were analyzed using unpaired Mann Whitney test (\*\* *p* = 0.0079). The grey  
1081 dashed line represents the limit of detection (200 CFU/ml) for this experiment. **(h)** Deletion of *lpp*  
1082 does not rescue growth after Lgt depletion. *E. coli* MG1655 (WT, black), or inducible deletion  
1083 strains for *lgt* ( $\Delta$ *lgt*, red), *lspA* ( $\Delta$ *lspA*, green) and *lolCDE* ( $\Delta$ *lolCDE*, blue) that either contained *lpp*  
1084 or had *lpp* deleted were grown in conditions that allowed for normal growth (Ara<sup>WT</sup>, 2% arabinose)  
1085 or decreased growth (Ara<sup>Low</sup>, 0.0125% arabinose) and CFUs at were enumerated at 5 hours post  
1086 treatment. Data are representative of two independent experiments each performed in duplicate (*ns*  
1087 = not significant, \**p* < 0.05, \*\**p* < 0.01).

1088

1089 **Figure 3: Identification of Lgt inhibitors.** **(a)** Representation of macrocycle peptide libraries  
1090 varying in size from 8-14 amino acids in length. The variable region (X<sub>n</sub>) of the macrocycle  
1091 libraries was encoded to allow the random incorporation of 11 natural amino acids and 5 non-  
1092 natural amino acids. **(b)** The 5 non-natural amino acids used in the generation of the libraries were  
1093 N- $\alpha$ -Methyl-L-phenylalanine (MeF), N- $\alpha$ -Methyl-L-glycine (MeG, Sarcosine), (S)-2-  
1094 Aminoheptanoic acid (Ahp), 4-Phenyl-L-phenylalanine (Bph) and (S)-1,2,3,4-  
1095 Tetrahydroisoquinoline-3-carboxylic acid (Tic). **(c)** Schematic representation of affinity-based  
1096 selections using recombinant Lgt-biotin immobilized on streptavidin magnetic beads. As discussed  
1097 in the Methods, Lgt-DDM was incubated with the macrocycle library and Lgt binders were eluted,  
1098 amplified and translated to generate new libraries enriched for Lgt binders. Iterative rounds of  
1099 affinity selection and washing were performed against recombinant Lgt and macrocycles that bound

## Inhibition of Lgt in Gram-negative bacteria

1100 to Lgt were identified using next generation sequencing. **(d)** Structure of the macrocyclic peptides  
1101 G9066, G2823 and G2824 identified in this study. **(e)** Development of the *in vitro* Lgt biochemical  
1102 assay. Lgt-DDM was incubated with phosphatidylglycerol and the Pal-IAAC peptide substrate  
1103 derived from the Pal lipoprotein (MQLNKVLKGLMIALPVMIAIACSSNKN) for 60 minutes at  
1104 RT, as described in the Methods. After Lgt catalyzes the transfer of diacylglyceryl from  
1105 phosphatidylglycerol to the Pal substrate (Pal-IAAC), glycerol-1-phosphophate (G1P) is released  
1106 from phosphatidylglycerol. Given the phosphatidylglycerol substrate used in our biochemical assay  
1107 contains a racemic glycerol moiety at the end of phosphatidyl group, both G1P and G3P are  
1108 released. G3P is quantitatively converted to Dihydroxyacetone phosphate (DHAP) with  
1109 concomitant formation of an equivalent amount of NADH by the action of glycerol 3-phosphate  
1110 dehydrogenase (G3PDH). Newly formed NADH will in turn quantitatively react with  
1111 pro-luciferin to generate equivalent amounts of luciferin, which ultimately results in  
1112 luminescence by luciferase that is proportional to the amount of luciferin available. **(f)** Dose-  
1113 dependent inhibition of Lgt biochemical activity. Lgt was incubated with phosphatidylglycerol and  
1114 the Pal-IAAC substrate in the presence or absence of G9066 (red), G2823 (green) or G2824  
1115 (blue). Luminescence values were normalized to DMSO controls (0% inhibition) and no enzyme  
1116 controls (100% inhibition). As a control, we incubated the Lgt reactions with a mutant substrate  
1117 peptide also derived from the Pal lipoprotein which has the conserved cysteine mutated to alanine  
1118 (Pal-IAAA, black). While the Pal-IAAA peptide binds to Lgt, it cannot be modified by Lgt and acts  
1119 as a non-modifiable, competitive peptide. Negative control reactions for each inhibitor were run in  
1120 the absence of Lgt enzymes (open symbols). Data are representative of at least two independent  
1121 experiments each performed in triplicate.

1122

## Inhibition of Lgt in Gram-negative bacteria

1123 **Figure 4: Lgti inhibit Lgt enzymatic activity in bacterial cells. (a)** Schematic representing the  
1124 isolation of PAP and non-PAP fractions. Bacterial cultures were resuspended in 6 mL of PAP  
1125 extraction buffer and centrifuged at  $100,000 \times g$  for 60 minutes. 6 mL of supernatants were  
1126 collected and pellets were resuspended in 200  $\mu$ L of PAP extraction buffer. PG-linked Lpp forms  
1127 were more readily detected with the concentrated PAP fractions. **(b)** SDS fractionation of WT  
1128 CFT073 cells to distinguish PG-associated versus non-PG-associated forms of Lpp.  
1129 CFT073*imp4213* cells were treated with SDS to enrich for PAP and non-PAP fractions as discussed  
1130 in the Methods and Western blot analysis was performed to detect levels of Lpp. GroEL was used  
1131 as a control for enrichment of the PAP fraction. While triacylated free Lpp (\*) is enriched in the  
1132 SDS-soluble non-PAP fraction, higher molecular weight Lpp species (§, †) are enriched in the SDS-  
1133 insoluble PAP fraction (§ = PG-linked diacylglyceryl pro-Lpp, DGPLP; † = other PG-linked Lpp  
1134 forms). Molecular weight markers (kDa) are denoted on the left of the blots. **(c)** Detection of Lpp  
1135 intermediates in MG1655 $\Delta$ *lgt*, MG1655 $\Delta$ *lspA* and MG1655 $\Delta$ *lolCDE* inducible deletion strains by  
1136 Western blot analysis. WT or inducible deletion strains were treated with 2% arabinose (A) or  
1137 0.2% glucose (G) and total cell lysates were harvested at 3 hours post treatment ( $\emptyset$  = unmodified  
1138 pro-Lpp, UPLP). PG-linked DGPLP (§) and other higher molecular weight Lpp species (†)  
1139 accumulated after LspA depletion. **(d)** Accumulation of pro-Lpp in cells treated with Lgti.  
1140 CFT073*imp4213* cells expressing an arabinose inducible form of Lpp (CFT073*imp4213* $\Delta$ *lpp:lpp*<sup>Ara</sup>)  
1141 were incubated with arabinose for 30 minutes prior to treatment with 0.5 $\times$ MIC concentrations of the  
1142 inhibitors for another 30 minutes. Lpp forms are denoted as described above. **(e)** Lgti treatment  
1143 leads to cell morphology changes and membrane blebs. CFT073*imp4213* cells were left untreated  
1144 or treated with Lgti at 1 $\times$ MIC for 30 minutes, fixed and incubated with FM-64 dye (red) and DAPI  
1145 solution (blue) to stain membranes and nucleic acid, respectively, and visualized by confocal

## Inhibition of Lgt in Gram-negative bacteria

1146 microscopy. Arrows represent membrane blebs and scale bars represent 3  $\mu\text{m}$ . **(f)** Quantitation of  
1147 cell size after treatment Lgti. A total of  $104 \pm 4$  cells per treatment were quantitated using ImageJ  
1148 (\* $p = 0.04$ ; \*\*\* $p = 0.002$ ). **(g)** CRISPRi knock-down of *lgt* gene expression sensitizes cells to Lgti  
1149 but not LspAi and LolCDEi. *E. coli* BW25113 cells expressing dCas9 and gRNAs specific to *lgt*,  
1150 *lspA* or *lolC* were untreated (black bars) or treated (white bars) with 2  $\mu\text{M}$  Lgti (G2823 and G2824),  
1151 0.05  $\mu\text{M}$  LspAi (globomycin) or 0.8  $\mu\text{M}$  LolCDEi (C1). A scrambled (scr) gRNA and gRNA  
1152 specific to *folA* (dihydrofolate reductase) were used as negative controls. Bacterial growth was  
1153 measured by OD<sub>600</sub> and values were normalized to the untreated sample for each gRNA, which was  
1154 set at 100% (\*\*\* $p < 0.001$ ). Data are representative of at least two independent experiments each  
1155 performed in triplicate.

1156

1157 **Figure 5: *lpp* deletion does not rescue growth after Lgti treatment.** CFT073*imp4213* (black),  
1158 CFT073*imp4213* $\Delta$ *lpp* (blue) or CFT073*imp4213* $\Delta$ *lpp* complemented with pBAD24 plasmids  
1159 encoding WT *lpp* (red) or *lpp* $\Delta$ *K* (green) were untreated (filled symbols) or treated (open symbols)  
1160 with 12.5  $\mu\text{M}$  Lgti G2824 **(a)**, 3.2  $\mu\text{M}$  LspAi (GBM) **(b)**, 6.3  $\mu\text{M}$  LolCDEi (C1) **(c)** and 1.6  $\mu\text{M}$   
1161 vancomycin **(d)**. G2823 was not be tested due to limitations in compound availability. CFUs were  
1162 enumerated at various times post treatment. **(e)** CFT073*imp4213*, CFT073*imp4213* $\Delta$ *lpp* or  
1163 CFT073*imp4213* $\Delta$ *lpp* complemented with WT *lpp* or *lpp* $\Delta$ *K* were treated with SDS to enrich for  
1164 PAP and non-PAP fractions. As the PAP fraction is 30-fold more concentrated than the non-PAP  
1165 fraction, it is more appropriate to compare different mutants within the same fraction. Lpp forms  
1166 are denoted as previously described (\* = Triacylated free Lpp; § = PG-linked DGPLP; ø = UPLP; †  
1167 = other PG-linked Lpp forms;  $\Delta$  = putative Lpp dimer). The identity of the band in Figure 5e

## Inhibition of Lgt in Gram-negative bacteria

1168 below the putative Lpp dimer ( $\Delta$ ) is unknown and could represent a degradation product. The  
1169 Lpp $\Delta$ K is his-tagged and hence migrates slower on SDS-PAGE relative to the mature triacylated  
1170 Lpp. Data are representative of three independent experiments. **(f)** Lgt depletion leads to loss of  
1171 PG-linked Lpp and Pal. CFT073 $\Delta$ *lgt* inducible deletion cells were grown in arabinose (Ara) or  
1172 glucose (Glu) and Lpp and Pal expression was determined in total cell lysates (TL), SDS-insoluble  
1173 (PAP) and SDS-soluble (non-PAP) fractions at 3 and 5 hours post treatment. GroEL was used as a  
1174 control for fractionation. Lpp forms are denoted by symbols as described in Figure 5e. **(g)** Lgti  
1175 treatment leads to loss of PG-associated Lpp and Pal. CFT073*imp4213* cells were treated with Lgti  
1176 (G2823 and G2824), LspAi (GBM) or LolCDEi (C1) for 30 minutes at 0.5 $\times$ MIC and levels of Lpp  
1177 and Pal were measured in total cell lysates, PAP and non-PAP fractions. Lpp forms are denoted by  
1178 symbols as described above.

1179

1180 **Figure 6: Inhibition of Lgt leads to depletion of essential OM lipoproteins and OMPs and**  
1181 **minimal IM accumulation of PG-linked DGPLP. (a)** CFT073*imp4213* cells were treated with  
1182 Lgti (G2823 and G2824), LspAi (GBM) or LolCDEi (C1) for 60 minutes at 1 $\times$ MIC and subjected  
1183 to sucrose gradient ultracentrifugation as described in the Methods. IM and OM fractions were  
1184 assigned based on the expression of MsbA and OmpA, respectively. These data re representative of  
1185 at least three independent experiments. **(b)** CFT073*imp4213* cells were treated with Lgti (G2823  
1186 and G2824), LspAi (GBM) or LolCDEi (C1) and IM were solubilized using sarkosyl. Lpp and Pal  
1187 levels were probed using Western blot analyses. Lpp forms denoted in the figure are as follows (\* =  
1188 triacylated free Lpp; § = PG-linked DGPLP;  $\emptyset$  = UPLP; † = other PG-linked Lpp forms;  $\Delta$  =  
1189 putative Lpp dimer). IM fractions were probed for MsbA and BamA as controls. Levels of

## Inhibition of Lgt in Gram-negative bacteria

1190 triacylated free Lpp (\*), UPLP (ø) and DGPLP (§) were quantitated by normalizing to MsbA and  
1191 levels detected in untreated cells (-) were set at 1.

1192

1193

1194

1195

1196

1197

1198

1199

1200

## Figure 2-supplement 1

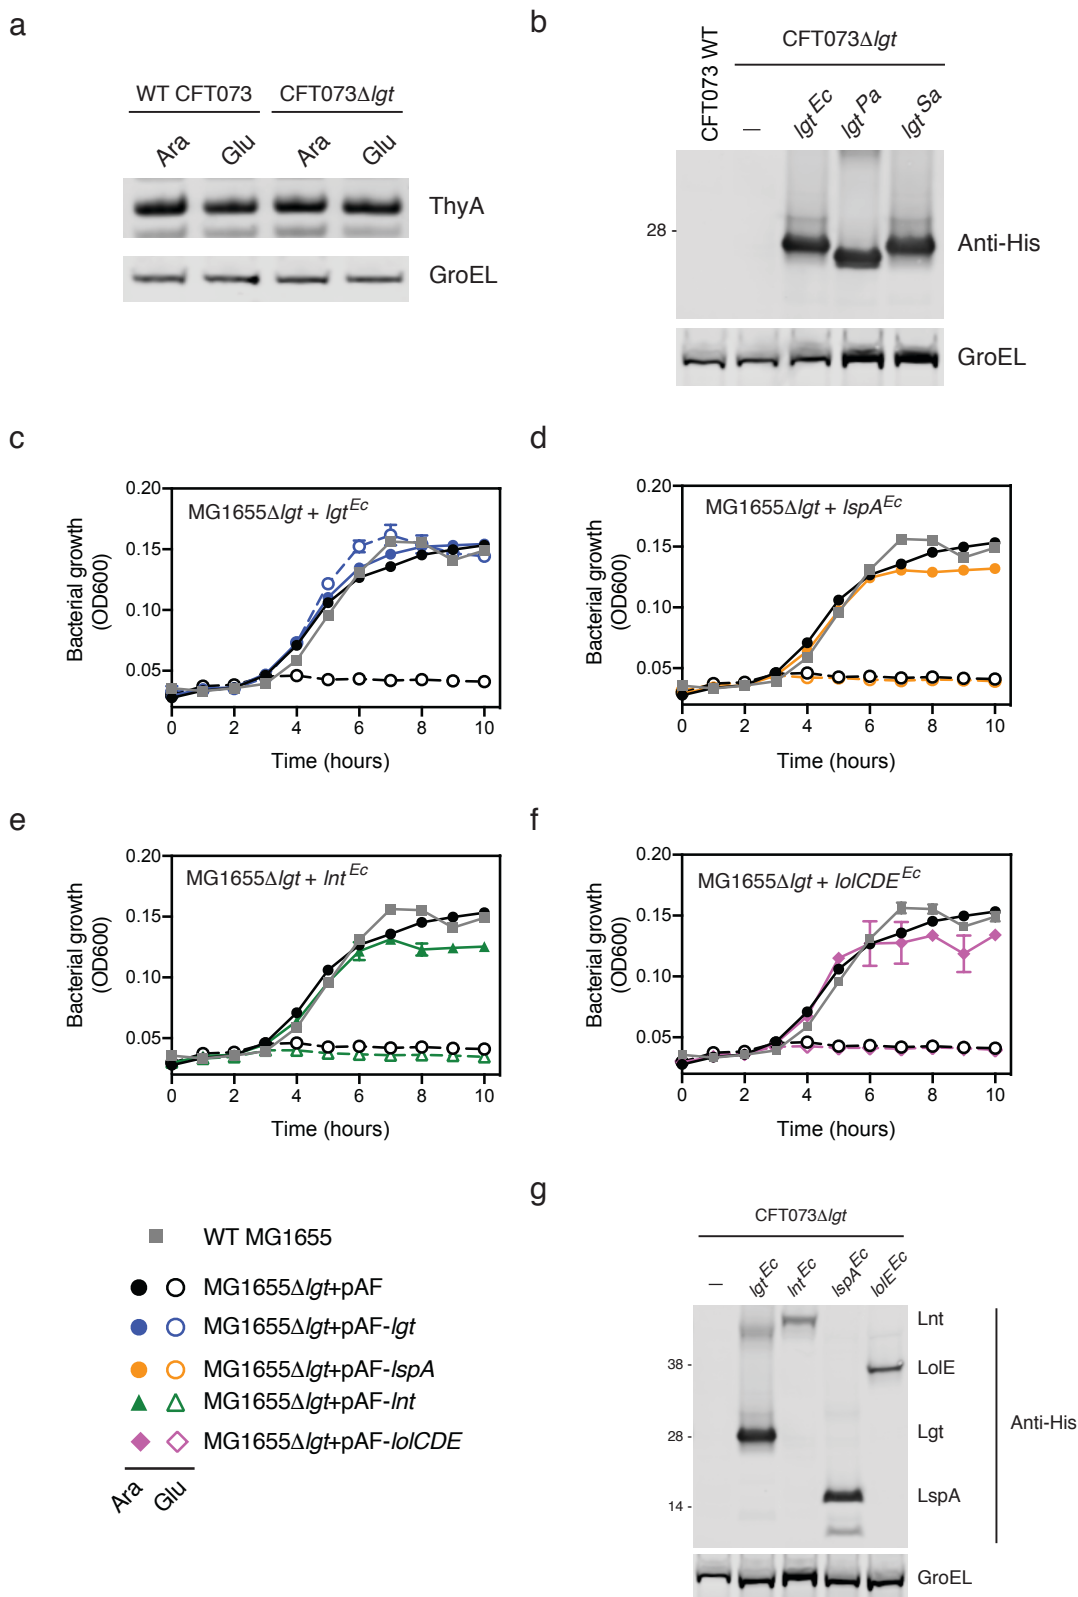

Diao et al. Supplementary Information

## Figure 2-figure supplement 2

a

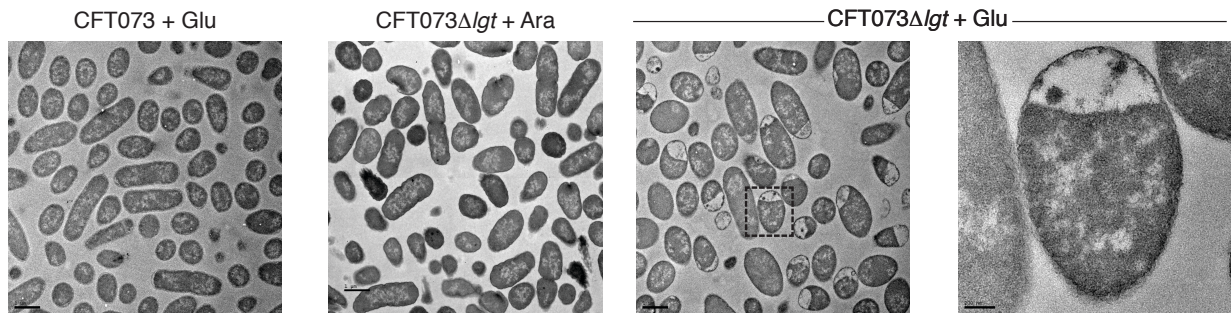

b

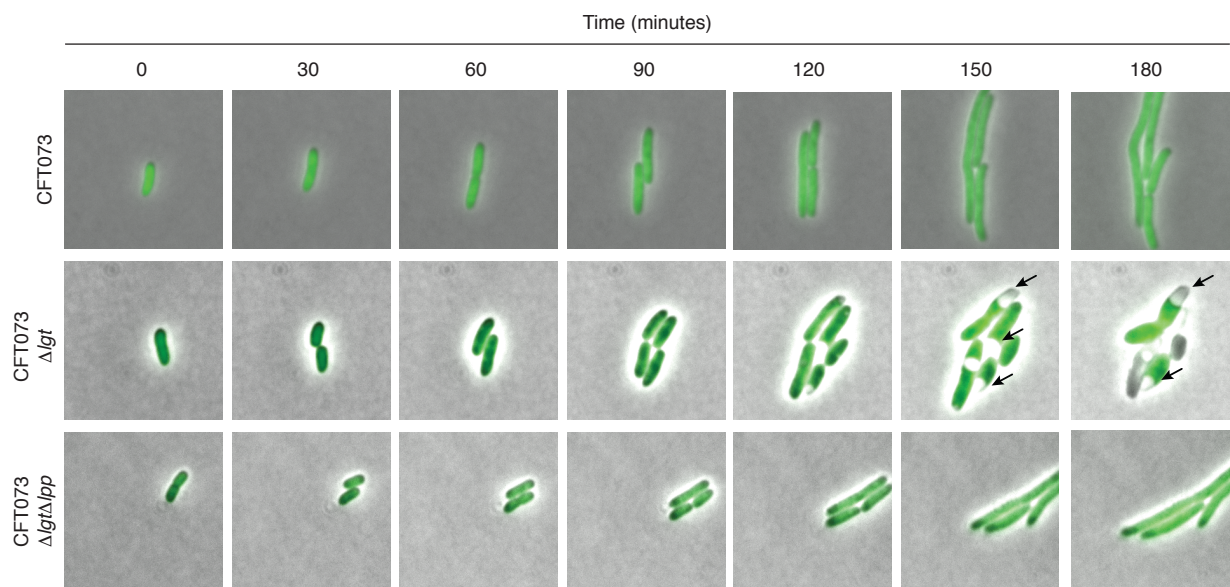

1  
2  
3  
4  
5  
6  
7



Diao et al. Supplementary Information

## Figure 3-supplement 1

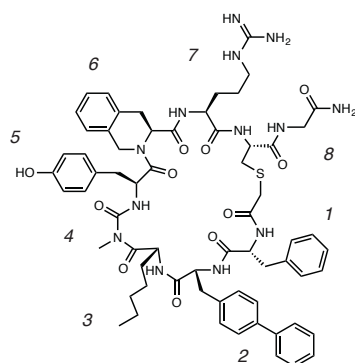

**508:** ClAcF-Bph-Ahp-MeG-Tyr-Tic-Arg-Cys-Gly-NH<sub>2</sub>

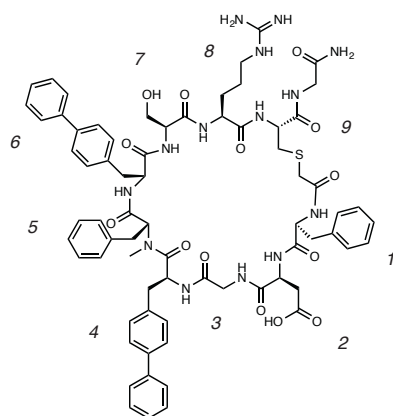

**693:** ClAcF-Asp-Gly-Bph-MeF-Bph-Ser-Arg-Cys-Gly-NH<sub>2</sub>

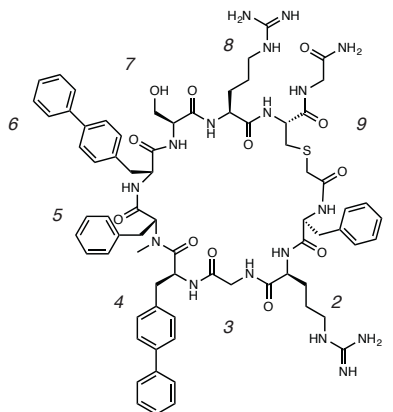

**692:** ClAcF-Arg-Gly-Bph-MeF-Bph-Ser-Arg-Cys-Gly-NH<sub>2</sub>

## Figure 4-supplement 1

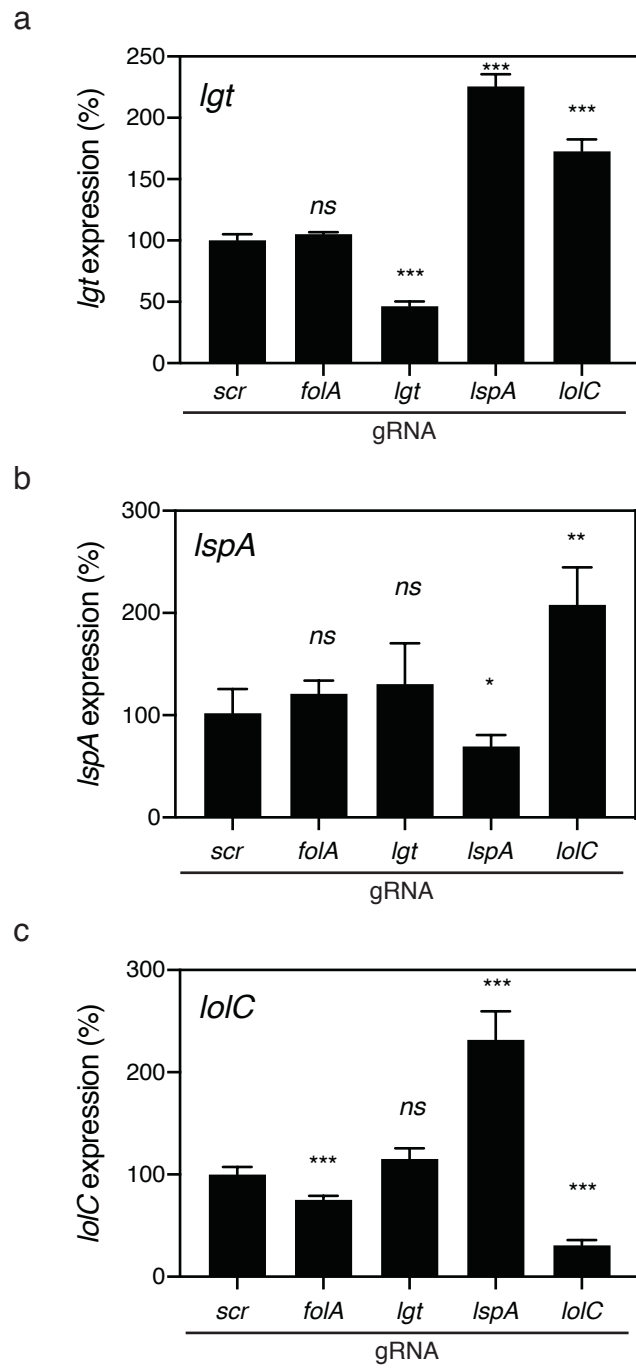

1

2

Diao et al. Supplementary Information

Figure 4-supplement 2

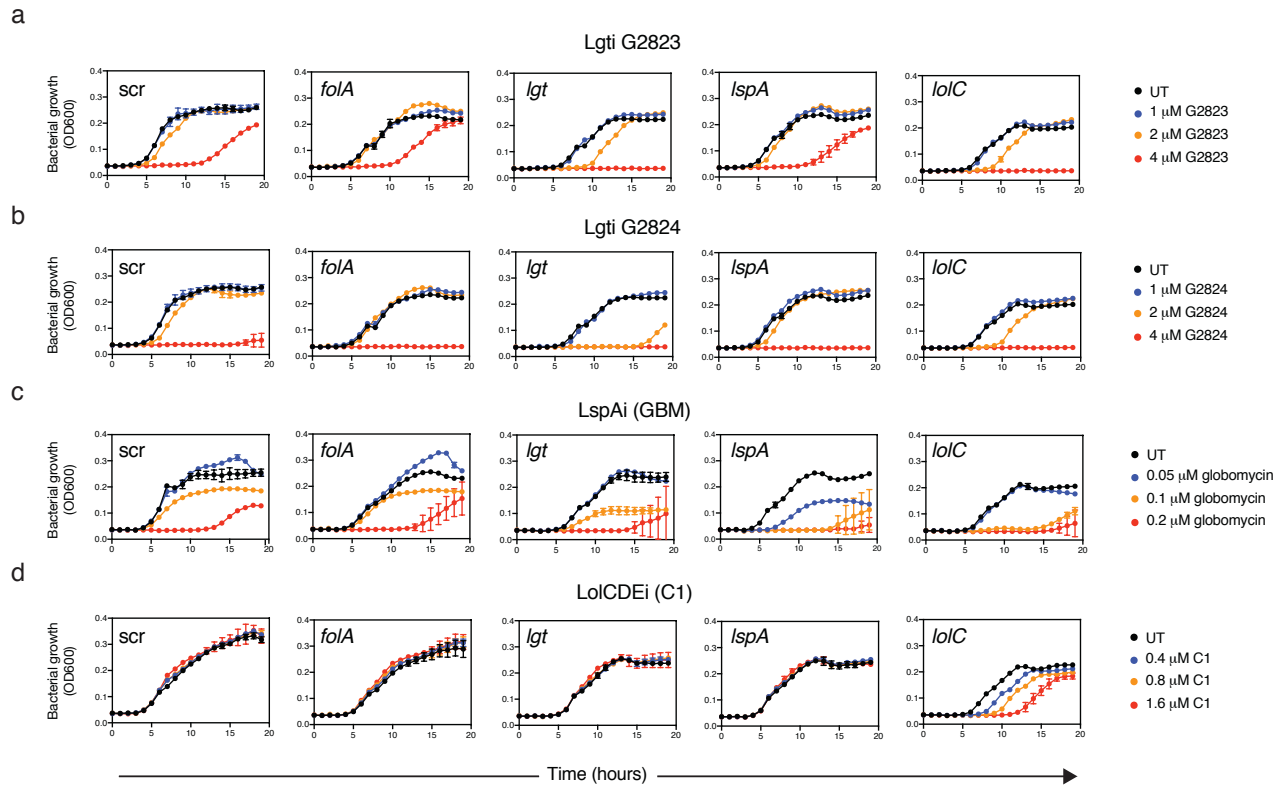

1

2

3

4

5

6

7

8

9

10

11

12

Diao et al. Supplementary Information

## Figure 5-supplement 1

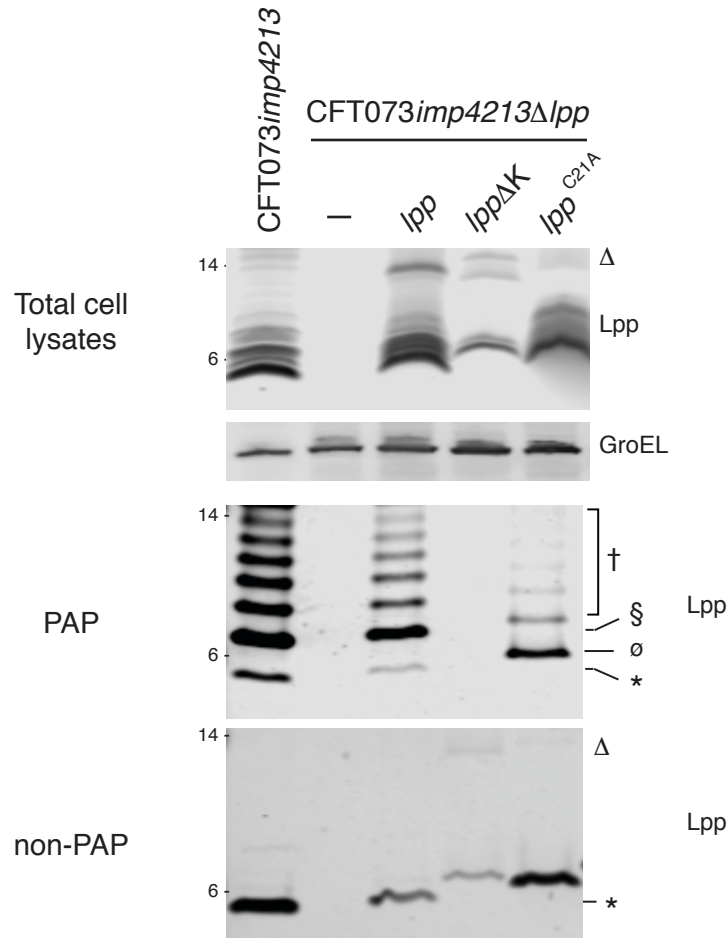

† = Other PG-linked Lpp forms  
 Δ = putative Lpp dimer  
 § = PG-linked diacylglycerol pro-Lpp (DGPLP)  
 ∅ = Unmodified pro-lpp (UPLP)  
 \* = Triacylated free Lpp

1  
2  
3  
4

Diao et al. Supplementary Information

## Figure 6-supplement 1

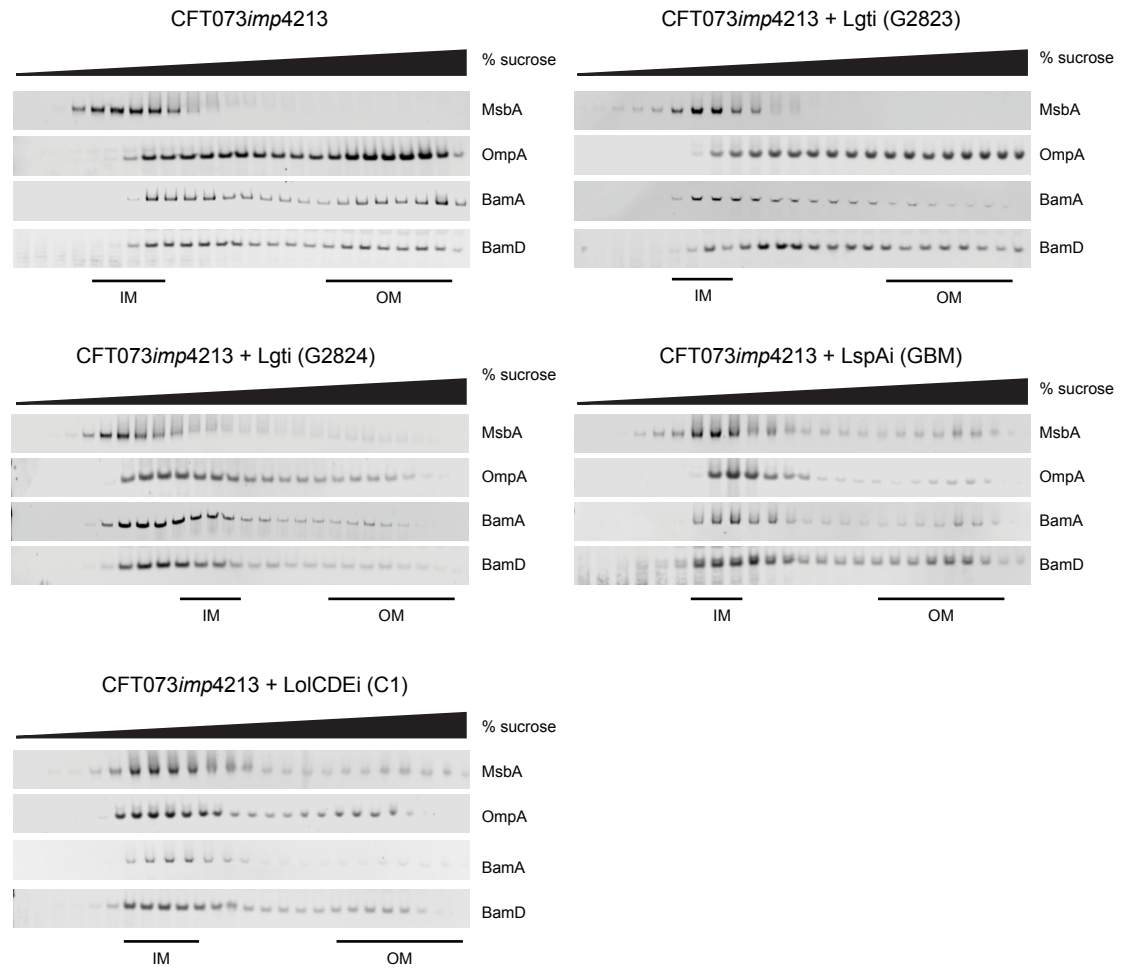

1  
2  
3  
4  
5  
6

Diao et al. Supplementary Information

## 1 **Figure supplement legends**

2 **Figure 2-figure supplement 1: (a)** Normal expression of thymidylate synthase (ThyA) after  
3 depletion of Lgt. WT CFT073 and CFT073 $\Delta$ lgt were grown under wild-type (4% arabinose, Ara)  
4 or depleted (0.2% glucose, Glu) conditions for 4 hours and total cell lysates were subjected to  
5 Western blot analyses using an anti-ThyA antibody. GroEL was used as a loading control. **(b)**  
6 Western blot analyses confirming protein expression after complementation with pLMG18  
7 expressing *lgt* from *E. coli* (*lgt*<sup>Ec</sup>), *P. aeruginosa* (*lgt*<sup>Pa</sup>) or *S. aureus* (*lgt*<sup>Sa</sup>). All complemented *lpp*  
8 contain a c-terminal His-tag. **(c-f)** Loss of *E. coli* MG1655 $\Delta$ lgt viability after Lgt depletion is  
9 rescued after complementing with *E. coli lgt* (*lgt*<sup>Ec</sup>) but not *E. coli lspA* (*lspA*<sup>Ec</sup>), *lnt* (*lnt*<sup>Ec</sup>) or  
10 *lolCDE* (*lolCDE*<sup>Ec</sup>). 2.5 mM IPTG was used to induce expression of *E. coli lspA*, *lnt* or *lolCDE*.  
11 Cells were grown in arabinose (filled symbols, Ara) or glucose (open symbols, Glu) and bacterial  
12 growth was measured by OD<sub>600</sub>. **(g)** Anti-His Western blot analyses demonstrating protein  
13 expression of *E. coli* Lgt, LspA, Lnt and LolE in CFT073 $\Delta$ lgt cells complemented with His-tagged  
14 versions of the respective genes.

15  
16 **Figure 2-figure supplement 2:** Lgt depletion results in IM contraction and the expected globular  
17 cellular phenotype. **(a)** CFT073 and CFT073 $\Delta$ lgt deletion strains were treated for 2 hours with 4%  
18 arabinose (Ara) or 0.2% glucose (Glu) and samples were processed for imaging by Transmission  
19 electron microscopy. Bars represent 1  $\mu$ m (200 nm for last panel). **(b)** Live cell imaging of WT  
20 CFT073, CFT073 $\Delta$ lgt and CFT073 $\Delta$ lgt $\Delta$ lpp inducible deletion strains containing a plasmid  
21 expressing *gfp* (pGFP) were grown in the presence of 0.2% glucose. Phase contrast and

Diao et al. Supplementary Information

1 fluorescence microscopy images were overlaid at various times post treatment. Arrows denote IM  
2 contraction which is not observed in the strain containing the *lpp* deletion.

3

4 **Figure 3-figure supplement 1:** Chemical structures of original hit macrocycles **508**, **692** and **693**  
5 identified in the library screen. The sequences of the macrocycles are represented in a linear format  
6 using the three letter amino acid codes. Non-natural amino acids are as follows: N- $\alpha$ -Methyl-L-  
7 phenylalanine (MeF), N- $\alpha$ -Methyl-L-glycine (MeG, Sarcosine), (S)-2-Aminoheptanoic acid (Ahp),  
8 4-Phenyl-L-phenylalanine (Bph) and (S)-1,2,3,4-Tetrahydroisoquinoline-3-carboxylic acid (Tic).  
9 CIAcf was fixed at the first position and used for cyclization.

10

11 **Figure 4-figure supplement 1:** Efficiency of CRISPRi-mediated downregulation of target genes.  
12 Total RNA was harvested from *E. coli* BW25113 cells transformed with scrambled (scr) gRNA or  
13 gRNA specific for *folA*, *lgt*, *lspA*, and *lolC* and gene expression of *lgt* (**a**), *lspA* (**b**) and *lolC* (**c**) was  
14 measured by RT-qPCR. Relative gene expression of *lgt*, *lspA* and *lolC* were calculated by  
15 normalizing to *rpoB* levels using the  $2^{-\Delta\Delta CT}$  method. Expression levels are graphed after  
16 comparison to “scr” gRNA, which was set at 100%. Data are representative of two independent  
17 experiments each performed in duplicate (*ns* = not significant, \**p* < 0.05, \*\**p* < 0.01, \*\*\**p* < 0.001).

18

19 **Figure 4-figure supplement 2:** Kinetics of growth inhibition after CRISPRi gRNA induction in *E.*  
20 *coli* BW25113. BW25113 cells expressing either scrambled (scr) gRNA or gRNAs specific to *folA*,  
21 *lgt*, *lspA* or *lolC* were treated with (**a**) Lgti G2823, (**b**) Lgti G2824, (**c**) LspAi (GBM) and (**d**)

Diao et al. Supplementary Information

1 LolCDEi (C1) and bacterial growth was measured by OD<sub>600</sub>. For all inhibitors, three concentrations  
2 were tested based on the MIC of each molecule and compared to untreated cells (UT, black) (Lgti =  
3 4, 2 and 1 μM; LspAi = 0.2, 0.1 and 0.05 μM and LolCDEi = 1.6, 0.8 and 0.4 μM). Data are  
4 representative of three independent experiments each performed in triplicate.

5

6 **Figure 5-figure supplement 1:** Determination of PG-linkage of WT Lpp, LppΔK and Lpp<sup>C21A</sup>.  
7 CFT073*imp4213*, CFT073*imp4213Δlpp* or CFT073*imp4213Δlpp* complemented with WT *lpp*,  
8 *lppΔK* or *lpp*<sup>C21A</sup> were treated with SDS to isolate PAP and non-PAP fractions. Lpp levels were  
9 detected by Western blot analyses in total cell lysates, PAP and non-PAP fractions. The Lpp<sup>C21A</sup>  
10 mutant contains an alanine in place of the conserved cysteine in the lipobox. The *lppΔK* construct  
11 is His-tagged and hence migrates slower on SDS-PAGE. Lpp forms are denoted in the figure (\* =  
12 triacylated free Lpp; § = PG-linked DGPLP; ø = UPLP; † = other PG-linked Lpp forms; Δ =  
13 putative Lpp dimer).

14

15 **Figure 6-figure supplement 1:** Membrane localization of BamA and BamD in CFT073*imp4213*  
16 cells treated with Lgti (G2823 and G2824), LspAi (GBM) or LolCDEi (C1) for 60 minutes at  
17 1×MIC and subjected to sucrose gradient ultracentrifugation as described in the Methods. Levels of  
18 BamA and BamD were detected by Western blot analyses. IM and OM fractions were assigned  
19 based on the expression of MsbA and OmpA, respectively, as presented in Figure 6.

20

21



Diao et al. Supplementary Information

**Table S1:** Lgti minimal inhibitory concentrations (MIC) against LolCDE-resistant *E. coli* isolates

| MG1655 <i>imp4213</i> | MIC ( $\mu$ M)  |                 |                 |                |                 |            |
|-----------------------|-----------------|-----------------|-----------------|----------------|-----------------|------------|
|                       | Lgti<br>(G9066) | Lgti<br>(G2823) | Lgti<br>(G2824) | LspAi<br>(GBM) | LolCDEi<br>(C2) | Vancomycin |
| WT                    | 3.1             | 4.7             | 3.1             | 0.2            | 2.4             | 0.8        |
| LolC (Q258K)          | 6.3             | 3.1             | 3.1             | 0.3            | 75              | 0.8        |
| LolC (N265K)          | 3.1             | 6.3             | 3.1             | 0.2            | 37.5            | 1.2        |
| LolD (S43R)           | 6.3             | 4.7             | 3.1             | 0.2            | 37.5            | 0.8        |
| LolE (F367L)          | 6.3             | 3.1             | 3.1             | 0.3            | 25              | 1.2        |
| LolE (P372L)          | 3.1             | 6.3             | 3.1             | 0.2            | 50              | 1.2        |

4  
5  
6  
7  
8  
9  
10  
11  
12  
13  
14  
15  
16  
17  
18  
19  
20  
21

1 **Table S2:** Bacterial strains and plasmids used in this study

| Bacterial strains                                             | Description                                                                                                                                  | Reference                                                                    |
|---------------------------------------------------------------|----------------------------------------------------------------------------------------------------------------------------------------------|------------------------------------------------------------------------------|
| <b><i>E. coli</i></b>                                         |                                                                                                                                              |                                                                              |
| BW25113                                                       | rrnB3 DElacZ4787 hsdR514 DE(araBAD)567 DE(rhaBAD)568 rph-1                                                                                   | (Baba et al., 2006)                                                          |
| MG1655                                                        | <i>E. coli</i> K-12 F- lambda- <i>ilvG</i> negative, <i>rfb-50 rph-1</i>                                                                     | ATCC 700926                                                                  |
| MG1655Δ <i>lgt</i>                                            | MG1655 Δ <i>lgt</i> ::kan with an arabinose-inducible integrated <i>lgt</i> copy                                                             | This study                                                                   |
| MG1655Δ <i>lgt</i> Δ <i>lpp</i>                               | MG1655 Δ <i>lpp</i> , Δ <i>lgt</i> ::kan containing an arabinose-inducible integrated <i>lgt</i> copy                                        | This study                                                                   |
| MG1655Δ <i>lspA</i>                                           | Arabinose-inducible conditional knockout of <i>lspA</i>                                                                                      | (Pantua et al., 2020)                                                        |
| MG1655Δ <i>lspA</i> Δ <i>lpp</i>                              | MG1655 Δ <i>lpp</i> , Δ <i>lspA</i> ::kan containing an arabinose-inducible integrated <i>lspA</i> copy                                      | This study                                                                   |
| MG1655Δ <i>lolCDE</i>                                         | Arabinose-inducible conditional knockout of <i>lolCDE</i>                                                                                    | This study                                                                   |
| MG1655Δ <i>lolCDE</i> Δ <i>lpp</i>                            | MG1655 Δ <i>lpp</i> , Δ <i>lolCDE</i> ::kan containing an arabinose-inducible integrated <i>lolCDE</i> copy                                  | This study                                                                   |
| CFT073                                                        | Bacteremia isolate, wild-type (O6:K2:H1)                                                                                                     | ATCC 700928                                                                  |
| CFT073Δ <i>lgt</i>                                            | CFT073 Δ <i>lgt</i> ::kan containing an arabinose-inducible integrated <i>lgt</i> copy                                                       | This study                                                                   |
| CFT073 <i>imp4213</i>                                         | CFT073 carrying the <i>imp4213</i> allele in <i>lptD</i>                                                                                     | (Ho et al., 2018)                                                            |
| CFT073 <i>imp4213</i> Δ <i>lgt</i>                            | CFT073 Δ <i>lgt</i> ::kan containing an arabinose-inducible integrated <i>lgt</i> copy and carrying the <i>imp4213</i> allele in <i>lptD</i> | This study                                                                   |
| CFT073 <i>imp4213</i> Δ <i>lpp</i>                            | CFT073 Δ <i>lpp</i> ::kan carrying the <i>imp4213</i> allele in <i>lptD</i>                                                                  | This study                                                                   |
| CFT073 <i>imp4213</i> Δ <i>lpp</i> : <i>lpp</i> <sup>wt</sup> | CFT073 <i>imp4213</i> Δ <i>lpp</i> ::kan containing pBAD24 expressing <i>lpp</i>                                                             | This study                                                                   |
| TOP10                                                         | pWQ601, general cloning strain                                                                                                               | Invitrogen Center for Staphylococcal Research, Nebraska                      |
| <i>S. aureus</i> USA300                                       | USA300 FPR3757                                                                                                                               | ATCC                                                                         |
| <i>A. baumannii</i> 19606                                     | <i>Acinetobacter baumannii</i> strain isolated in a patient urine sample                                                                     | ATCC                                                                         |
| <i>P. aeruginosa</i> PA14                                     | <i>Pseudomonas aeruginosa</i> strain UCBPP-PA14 originally isolated from a burn wound                                                        | ATCC                                                                         |
| PA14 <i>imp4213</i>                                           | <i>Pseudomonas aeruginosa</i> UCBPP-PA14 containing the <i>imp4213</i> mutation in <i>lptD</i>                                               | This study                                                                   |
| <b>Plasmids</b>                                               |                                                                                                                                              |                                                                              |
| pKD4                                                          | Kanamycin resistance (Kan <sup>R</sup> ) cassette flanked by FRT (FLP recognition target) sites, oriRγ                                       | (Silhavy, Kahne, & Walker, 2010)                                             |
| pKD46                                                         | Expresses the phage λ Red recombinase, Amp <sup>R</sup> , temperature sensitive, oriRγ                                                       | (Cowles, Li, Semmelhack, Cristea, & Silhavy, 2011; Wilson & Bernstein, 2015) |
| pCP20                                                         | Thermal induction of FLP recombinase expression, Amp <sup>r</sup> , temperature sensitive                                                    | (Kovacs-Simon, Titball, & Michell, 2011)                                     |
| pLDR8                                                         | Lambda integrase expression vector                                                                                                           | ATCC 77357                                                                   |
| pLDR9                                                         | Lambda att site integration vector                                                                                                           | ATCC 77358                                                                   |

Diao et al. Supplementary Information

|                                     |                                                              |                                     |
|-------------------------------------|--------------------------------------------------------------|-------------------------------------|
| pBAD24                              | Arabinose inducible expression vector                        | ATCC 87399                          |
| pBAD24- <i>lpp</i>                  | pBad24 expressing <i>E. coli lpp</i>                         | This study                          |
| pBAD24- <i>lpp</i> $\Delta$ K       | pBad24 expressing <i>E. coli lpp</i> $\Delta$ K              | This study                          |
| pBAD24- <i>lpp</i> <sup>c21A</sup>  | pBad24 expressing <i>E. coli lpp</i> <sup>c21A</sup>         | This study                          |
| pdCas9-bacteria_GNE                 | Based on AddGene plasmid 44249                               | This study                          |
| pgRNA-bacteria_GNE                  | Based on AddGene plasmid 44251                               | This study                          |
| pLMG18                              | Low-copy IPTG-inducible expression plasmid, Cmr <sup>r</sup> | (M. Tokunaga, Tokunaga, & Wu, 1982) |
| pLMG18- <i>lgt</i> <sup>Ec</sup>    | pLMG18 expressing <i>E. coli lgt</i>                         | This study                          |
| pLMG18- <i>lgt</i> <sup>Sa</sup>    | pLMG18 expressing <i>S. aureus lgt</i>                       | This study                          |
| pLMG18- <i>lgt</i> <sup>Pa</sup>    | pLMG18 expressing <i>P. aeruginosa lgt</i>                   | This study                          |
| pLMG18- <i>lspA</i> <sup>Ec</sup>   | pLMG18 expressing <i>E. coli lspA</i>                        | This study                          |
| pLMG18- <i>lnt</i> <sup>Ec</sup>    | pLMG18 expressing <i>E. coli lnt</i>                         | This study                          |
| pLMG18- <i>lolCDE</i> <sup>Ec</sup> | pLMG18 expressing <i>E. coli lolCDE</i>                      | This study                          |
| pGFP                                | pBla_Short encoding sfGFP                                    | (Storek et al., 2018)               |

1

## 2 References

- 3 Baba, T., Ara, T., Hasegawa, M., Takai, Y., Okumura, Y., Baba, M., et al. (2006). Construction of  
4 *Escherichia coli* K-12 in-frame, single-gene knockout mutants: the Keio collection. *Molecular Systems*  
5 *Biology*, 2(1), 2006.0008. <http://doi.org/10.1038/msb4100050>
- 6 Cowles, C. E., Li, Y., Semmelhack, M. F., Cristea, I. M., & Silhavy, T. J. (2011). The free and bound forms  
7 of Lpp occupy distinct subcellular locations in *Escherichia coli*. *Molecular Microbiology*, 79(5), 1168–  
8 1181. <http://doi.org/10.1111/j.1365-2958.2011.07539.x>
- 9 Ho, H., Miu, A., Alexander, M. K., Garcia, N. K., Oh, A., Zilberleyb, I., et al. (2018). Structural basis for  
10 dual-mode inhibition of the ABC transporter MsbA. *Nature*, 557(7704), 196–201.  
11 <http://doi.org/10.1038/s41586-018-0083-5>
- 12 Kovacs-Simon, A., Titball, R. W., & Michell, S. L. (2011). Lipoproteins of bacterial pathogens. *Infection*  
13 *and Immunity*, 79(2), 548–561. <http://doi.org/10.1128/IAI.00682-10>
- 14 Pantua, H., Skippington, E., Braun, M.-G., Noland, C. L., Diao, J., Peng, Y., et al. (2020). Unstable  
15 Mechanisms of Resistance to Inhibitors of *Escherichia coli* Lipoprotein Signal Peptidase. *mBio*, 11(5),  
16 VMBF–0016–2015. <http://doi.org/10.1128/mBio.02018-20>
- 17 Silhavy, T. J., Kahne, D., & Walker, S. (2010). The bacterial cell envelope. *Cold Spring Harbor Perspectives*  
18 *in Biology*, 2(5), a000414–a000414. <http://doi.org/10.1101/cshperspect.a000414>
- 19 Storek, K. M., Auerbach, M. R., Shi, H., Garcia, N. K., Sun, D., Nickerson, N. N., et al. (2018). Monoclonal  
20 antibody targeting the  $\beta$ -barrel assembly machine of *Escherichia coli* is bactericidal. *Proceedings of the*  
21 *National Academy of Sciences of the United States of America*, 115(14), 3692–3697.  
22 <http://doi.org/10.1073/pnas.1800043115>
- 23 Tokunaga, M., Tokunaga, H., & Wu, H. C. (1982). Post-translational modification and processing of  
24 *Escherichia coli* prolipoprotein in vitro. *Proceedings of the National Academy of Sciences of the United*  
25 *States of America*, 79(7), 2255–2259. <http://doi.org/10.1073/pnas.79.7.2255>
- 26 Wilson, M. M., & Bernstein, H. D. (2015). Surface-Exposed Lipoproteins: An Emerging Secretion  
27 Phenomenon in Gram-Negative Bacteria. *Trends in Microbiology*.  
28 <http://doi.org/10.1016/j.tim.2015.11.006>

29

30

Diao et al. Supplementary Information

1 **Table S3:** Primers used in this study for strain generation and quantitative PCR

| <b>Primer</b>                   | <b>Sequence (5' to 3')</b>                                                                                                                   |
|---------------------------------|----------------------------------------------------------------------------------------------------------------------------------------------|
| <b><i>Strain generation</i></b> |                                                                                                                                              |
| CFT073Δ <i>lgt.F</i>            | TTTCAATCGCTGTTCTCTTTTCAGCGAAATAACAAGAAGCTTGTGGTGACAG<br>GTGTAGGCTGGAGCTGCTTC                                                                 |
| CFT073Δ <i>lgt.R</i>            | CCTTCGTCGAGCACTTTTTGCATCAGTTCTAAATACTGTTTCATGGTTCC<br>CATATGAATATCCTCCTTAGTTCCTATTC                                                          |
| MG1655Δ <i>lolCDE.F</i>         | CGGGGGCTTTTCAGATTAGCCCTGACGATCACTTACAGTTCAGACGTTTACCCAT<br>CTTGCTTTCGCTTATATACTCGTGTCTTTGCTACAGCAACCAGACGGATTTCTGTGT<br>AGGCTGGAGCTGCTTC     |
| MG1655Δ <i>lolCDE.R</i>         | CCCACTGCAACTGCCGACCGCTATCAAACACGCCAAGCGCAATTTTTGTTCCACC<br>AATATCAAACCCGTAATACATTGCCGCTCCTTGTTTTAATGTACTGCCCATATGA<br>ATATCCTCCTTAGTTCCTATTC |
| <b><i>Quantitative PCR</i></b>  |                                                                                                                                              |
| <i>lgt.F</i>                    | CTCGGTGGACGTATTGGTTATG                                                                                                                       |
| <i>lgt.R</i>                    | TCACCACGATAACGCCAATC                                                                                                                         |
| <i>lgt.PRB</i>                  | / <u>56-FAM</u> / ACAATTTCC /ZEN/ CGCAGTTTATGGCCG / <u>3IABkFQ</u> /                                                                         |
| <i>lspA.F</i>                   | TCGATCTGGGCAGCAAATAC                                                                                                                         |
| <i>lspA.R</i>                   | CGCTATCGGCAAGGAAACTAA                                                                                                                        |
| <i>lspA.PRB</i>                 | / <u>56-FAM</u> / TGCAGATTA /ZEN/ AGCGACGGGAACAGC / <u>3IABkFQ</u> /                                                                         |
| <i>lolC.F</i>                   | CCACAGGCAATTCTCTCTTCT                                                                                                                        |
| <i>lolC.R</i>                   | TAGGTGCGACGCGATTAAC                                                                                                                          |
| <i>lolC.PRB</i>                 | / <u>56-FAM</u> / CTCTCTTAA /ZEN/ CCCGCAGCAACTCCC / <u>3IABkFQ</u> /                                                                         |

2

3
